# Supplementary material
Source: publisher figshare collection journal article supplement (https://geolsoc.figshare.com/articles/dataset/_/3452936)
Supplement: Supplementary file 4 [file 1]

### References for 1,094 cladograms in Supplementary Data Table 1

- Ahlberg, P. E. (1989) Paired fin skeletons and relationships of the fossil group Porolepiformes (Osteichthyes: Sarcopterygii). *Zoological Journal of the Linnean Society* **96**, 119-166.
- Ahlberg, P. E. (1991) A re-examination of sarcopterygian interrelationships, with special reference to the Porolepiformes. *Zoological Journal of the Linnean Society* **103**, 241-287.
- Ahlberg, P. E. (1995) *Elginerpeton pancheni* and the earliest tetrapod clade. *Nature* **373**, 420-425.
- Ahlberg, P. E. & Johanson, Z. (1997) Second tristichopterid (Sarcopterygii, Osteolepiformes) from the Upper Devonian of Canowindra, New South Wales, Australia, and phylogeny of the Tristichopteridae. *Journal of Vertebrate Paleontology* **17**, 653-673.
- Ahlberg, P. E. & Milner, A. R. (1994) The origin and early diversification of tetrapods. *Nature* **368**, 507-513.
- Albright, L. B., Alvarez, F., Rong, J. Y. & Boucot, A. J. (1998) New genus of tapir (Mammalia: Tapiridae) from the Arikarean (earliest Miocene) of the Texas coastal plain. *Journal of Vertebrate Paleontology* **18**, 200-217.
- Ammermann, L. K. & Hillis, D. M. (1992) A molecular test of bat relationships: monophyly or diphyly? *Systematic Biology* **41**, 222-232.
- Andersen, N. M. (1979) Phylogenetic inference as applied to the study of evolutionary diversification of semiaquatic bugs (Hemiptera: Gerromorpha). *Systematic Zoology* **28**, 554-578.
- Anderson, L. C. & Roopnarine, P. D. (2003) Evolution and phylogenetic relationships of Neogene Corbulidae (Bivalvia; Myoidea) of tropical America. *Journal of Paleontology* **77**, 1086-1102.
- Andrews, P. (1988). A phylogenetic analysis of the primates In *The Phylogeny and Classification of the Tetrapods* (ed. M. J. Benton), pp. 143-175. Oxford: Clarendon Press.
- Arsenault, M. & Janvier, P. (1991). The anaspid-like craniates of the Escuminac Formation (Upper Devonian) from Miguasha (Quebec, Canada), with remarks on anaspid-petromyzontid relationships In *Early Vertebrates and Related Problems of Evolutionary Biology* (eds. M.-M. Chang, Y.-h. Liu & G.-r. Zhang), pp. 19-40. Beijing: Science Press.
- Azanza, B. & Ginsburg, L. (1997) A revision of the large lagomerycid artiodactyls of Europe. *Palaeontology* **40**, 461-485.
- Baccetti, B. (1979). Ultrastructure of sperm and its bearing on arthropod phylogeny In *Arthropod Phylogeny* (ed. A. P. Gupta), pp. 609-644. New York: Van Nostrand Reinhold Company.
- Baehr, M. (1979) Vergleichende Untersuchungen am Skelett und an der Coxalmuskulatur des Prothorax der Coleoptera. Ein Beitrag zur Klärung der phylogenetischen Beziehungen der Adephaga (Coleoptera, Insecta). *Zoologica* **44**, 1-76.
- Baez, A. M. & Pugener, L. A. (1998) A new Palaeogene pipid frog from northwestern Patagonia. *Journal of Vertebrate Paleontology* **18**, 511-524.
- Baez, A. M. & Rage, J. C. (1998) Pipid frogs from Upper Cretaceous of Ibeceten, Niger. **41**, 669-691.
- Bailey, W. J., Slightom, J. L. & Goodman, M. (1992) Rejection of the "flying primate" hypothesis by phylogenetic evidence from the e-globin gene. *Science* **256**, 86-89.
- Bajpaj, S. & Domning, D. P. (1997) A new dugongine sirenian from the Early Miocene of India. *Journal of Vertebrate Paleontology* **17**, 219-228.

- Balanoff, A. M. & Rowe, T. (2007) Osteological description of an embryonic skeleton of the extinct elephant bird, *Aepyornis* (Palaeognathae: Ratitae). *Journal of Vertebrate Paleontology* **27**, 1-53.
- Ballard, J. W. O., Olsen, G. J., Faith, D. P., Odgers, W. A., Rowell, D. M. & Atkinson, P. W. (1992) Evidence from 12S ribosomal RNA that onychophorans are modified arthropods. *Science* **258**, 1345-1348.
- Barry, J. C. (1988) *Sissopsalis*, a Middle and Late Miocene proviverrine creodont (Mammalia) from Pakistan and Kenya. *Journal of Vertebrate Paleontology* **8**, 25-45.
- Barsbold, R. & Osmólska, H. (1990). Ornithomimosauria In *The Dinosauria* (eds. D. B. Weishampel, P. Dodson & H. Osmólska), pp. 225-244. Berkeley: University of California Press.
- Barucca, M., Olmo, E., Schiaparelli, S. & Canapa, A. (2004) Molecular phylogeny of the family Pectinidae (Mollusca: Bivalvia) based on mitochondrial 16S and 12S rRNA genes. *Molecular Phylogenetics and Evolution* **31**, 89-95.
- Baskin, J. A. (1982) Tertiary Procynoninae (Mammalia: Carnivora) of North America. *Journal of Vertebrate Paleontology* **2**, 71-93.
- Baskin, J. A. (1989) Comments on New World Tertiary Procynonidae (Mammalia: Carnivora). *Journal of Vertebrate Paleontology* **9**, 110-117.
- Beard, K. C. & Houde, P. (1989) An unusual assemblage of diminutive plesiadapiforms (Mammalia, ?Primates) from the Early Eocene of the Clark's Fork Basin, Wyoming. *Journal of Vertebrate Paleontology* **9**, 388-399.
- Beintema, J. J., Rodewald, K., Braunitzer, G., Czelusniak, J. & Goodman, M. (1991) Studies on the phylogenetic position of the Ctenodactylidae (Rodentia). *Molecular Biology and Evolution* **8**, 151-154.
- Bemis, W. E. (1984) Paedomorphosis and the evolution of the Dipnoi. *Paleobiology* **10**, 293-307.
- Benton, M. J. (1985) Classification and phylogeny of the diapsid reptiles. *Zoological Journal of the Linnean Society* **84**, 97-164.
- Benton, M. J. (1991). Amniote phylogeny In *Origins of the Higher Groups of Tetrapods* (eds. H. P. Schultze & L. Trueb), pp. 317-330. Ithaca, N.Y.: Cornell University Press.
- Benton, M. J. & Allen, J. L. (1997) Boreopricea from the Lower Triassic of Russia, and the relationships of the prolacertiform reptiles. *Palaeontology* **40**, 931-953.
- Benton, M.J. (1990) Origin and interrelationships of dinosaurs. In *The Dinosauria* (eds. D.B. Weishampel, P. Dodson, & H. Osmólska), pp. 11-30. Berkeley: University of California Press.
- Benton, M. J. & Clark, J. (1988). Archosaur phylogeny and the relationships of the Crocodylia In *The Phylogeny and Classification of the Tetrapods*. (ed. M. J. Benton). Systematics Association Special Volume. Oxford: Clarendon Press.
- Bernini, F. (1986) Current ideas on the phylogeny and the adaptive radiations of Acarida. *Bollettino di Zoologia* **53**, 279-313.
- Bernor, R. L., Kovar-Eder, J., Lipscomb, D., Rögl, F., Sen, S. & Tobien, H. (1988) Systematic, stratigraphic, and paleoenvironmental contexts of first-appearing Hipparion in the Vienna Basin, Austria. *Journal of Vertebrate Paleontology* **8**, 427-452.
- Berta, A. (1981) The Plio-Pleistocene hyaena *Chasmaporthetes ossifragus* from Florida. *Journal of Vertebrate Paleontology* **1**, 341-356.
- Berta, A. (1994) A new species of phocoid pinniped Pinnarctidion from the early Miocene of Oregon. *Journal of Vertebrate Paleontology* **14**, 405-413.
- Berta, A. & Ray, C. E. (1990) Skeletal morphology and locomotor capabilities of the archaic pinniped *Enaliarctos melasi*. *Journal of Vertebrate Paleontology* **10**, 141-157.

- Bertelli, S. & Giannini, N. P. (2005) A phylogeny of extant penguins (Aves: Sphenisciformes) combining morphology and mitochondrial sequences. *Cladistics* **21**, 209-239.
- Bertelli, S., Giannini, N. P. & Ksepka, D. T. (2006) Redescription and phylogenetic position of the Early Miocene penguin *Paraptenodytes Antarcticus* from Patagonia. *American Museum Novitates* **3525**, 1-36.
- Beutel, R. G. (1992) Larval head structures of *Ommoglymmius hamatus* and their implications for the relationships of Rhysodidae (Coleoptera: Carabidae). *Entomologica Scandinavica* **23**, 169-184.
- Beutel, R. G. (1993) Phylogenetic analysis of adephaga (coleoptera) based on characters of the larval head. *Systematic Entomology* **18**, 127-147.
- Beutel, R. G. (1995). The Adephaga (Coleoptera): phylogeny and evolutionary history In *Biology, Phylogeny and Classification of Coleoptera. Papers Celebrating the 80th Birthday of Roy A. Crowson* (eds. J. Pakaluk & S. A. Slipinski), pp. 173-217. Warsaw, Poland: Muzeum I Instytut Zoologii PAN.
- Blake, D. B. (1987) A classification and phylogeny of post-Palaeozoic sea stars (Asteroidea: Echinodermata). *Journal of Natural History* **21**, 481-528.
- Blake, D. B. (1996) Redescription and interpretation of the asteroid species *Tropidaster pectinatus* from the Jurassic of England. *Palaeontology* **39**, 179-188.
- Bolt, J. R. (1991). Lissamphibian origins In *Origins of the Higher Groups of Tetrapods* (eds. H. P. Schultze & L. Trueb), pp. 194-222. Ithaca, N.Y.: Cornell University Press.
- Boudreaux, H. B. (1979). Significance of intersegmental tendon systems in arthropod phylogeny, and a monophyletic classification of the Arthropoda In *Arthropod Phylogeny* (ed. A. P. Gupta), pp. 551-586. New York: Van Nostrand Reinhold Company.
- Boughton, D. A., Collette, B. B. & McCune, A. R. (1991) Heterochrony in jaw morphology of needlefishes (Teleostei: Belontiidae). *Systematic Zoology* **40**, 329-354.
- Bourdon, E. (2005) Osteological evidence for sister group relationship between pseudo-toothed birds (Aves: Odontopterygiformes) and waterfowls (Anseriformes). *Naturwissenschaften* **92**, 586-591.
- Bourdon, E., Bouya, B. & Iarochene, M. (2005) Earliest African Neornithine bird: a new species of Prophaethontidae (Aves) from the Paleocene of Morocco. *Journal of Vertebrate Paleontology* **25**, 157-170.
- Bourdon, E., De Ricqlès, A. & Cubo, J. (2009) A new Transantarctic relationship: morphological evidence for a Rheidae-Dromaiidae-Casuariidae clade (Aves, Palaeognathae, Ratitae). *Zoological Journal of the Linnean Society* **156**, 641-663.
- Bourgoin, T. (1986) Valeur morphologique de la lame maxillaire chez les Hemiptera; remarques phylogénétiques. *Annales de la Société Entomologique de France* **22**, 413-422.
- Bousfield, E. L. (1995) A contribution to the natural classification of Lower and Middle Cambrian Arthropods: food gathering and feeding mechanisms. *Amphipacifica* **2**, 3-34.
- Brandt, A. (1992) Origin of Antarctic Isopoda (Crustacea, Malacostraca). *Marine Biology* **113**, 415-423.
- Briggs, D. E. G. & Fortey, R. A. (1989) The early radiation and relationships of the major arthropod groups. *Science* **246**, 241-243.
- Briggs, D. E. G., Fortey, R. A. & Wills, M. A. (1992) Morphological disparity in the Cambrian. *Science* **256**, 1670-1673.
- Brinkman, D. B. & Nicholls, E. L. (1991) Anatomy and relationships of the turtle *Boremys pulchra* (Testudines: Baenidae). *Journal of Vertebrate Paleontology* **11**, 302-315.

- Brinkman, D. B. & Nicholls, E. L. (1993) The skull of *Neurankylus eximius* (Testudines: Baenidae) and a reinterpretation of the relationships of this taxon. *Journal of Vertebrate Paleontology* **13**, 273-281.
- Brochu, C. A. (1996) A review of "Leidyosuchus" (Crocodyliformes, Eusuchia) from the Cretaceous through Eocene of North America. *Journal of Vertebrate Paleontology* **16**, 679-697.
- Brothers, D. J. (1975) Phylogeny and classification of the aculeate Hymenoptera, with special reference to Mutillidae. *Kansas University Scientific Bulletin* **50**, 483-648.
- Brown, D. B. & Cruickshank, A. R. I. (1994) The skull of the Callovian plesiosaur *Cryptoclidus eurymerus*, and the sauropterygian cheek. *Palaeontology*. **37**, 941-953.
- Browne, D. J. & Scholtz, C. H. (1995) Phylogeny of the families of Scarabaeoidea (Coleoptera) based on characters of the hindwing articulation, hindwing base and wing venation. *Systematic Entomology* **20**, 145-173.
- Brusca, C. & Brusca, G. J. (1990). Phylum Arthropoda: the Cheliceriformes In *Invertebrates* (eds. C. Brusca & G. J. Brusca), pp. 493-542. Sunderland, Massachusetts: Sinauer.
- Brusca, C. & Brusca, G. J. (1990). Phylum Arthropoda: the insects and myriapods (eds. C. Brusca & G. J. Brusca), pp. 543-593. Sunderland, Massachusetts.: Sinauer.
- Budd, G. (1993) A Cambrian gilled lobopod from Greenland. *Nature* **364**, 709-711.
- Buscalioni, A. D., Ortega, F., Pérez-Moreno, B. P. & Sevans, S. E. (1996) The Upper Jurassic maniraptoran theropod *Lisboasaurus estesi* (Guimarota, Portugal) reinterpreted as a crocodylomorph. *Journal of Vertebrate Paleontology* **16**, 358-362.
- Buscalioni, A. D. & Sanz, J. L. (1990) *Montsecosuchus depereti* (Crocodylomorpha, Atoposauridae), new denomination for *Alligatorium depereti* Vidal, 1915 (Early Cretaceous, Spain): redescription and phylogenetic relationships. *Journal of Vertebrate Paleontology* **10**, 244-254.
- Butler, J. E. & Leone, C. A. (1967) Immunotaxonomic investigations of the Coleoptera. *Systematic Zoology* **16**, 56-63.
- Butler, P. M. (1988). Phylogeny of the insectivores In *The Phylogeny and Classification of the Tetrapods* (ed. M. J. Benton), pp. 117-142. Oxford: Clarendon Press.
- Butler, P. M. (1997) An alternative hypothesis on the origin of docodont molar teeth. *Journal of Vertebrate Paleontology* **17**, 435-439.
- Caldwell, M. W., Carroll, R. L. & Kaiser, H. (1995) The pectoral girdle and forelimb of *Carsosaurus marchesetti* (Aigialosauridae), with a preliminary phylogenetic analysis of mosasauroids and varanoids. *Journal of Vertebrate Paleontology* **15**, 516- 531.
- Campbell, K. S. W. & Barwick, R. E. (1984) The choana, maxillae, premaxillae and anterior palatal bones of early dipnoans. *Proceedings of the Linnean Society of New South Wales* **107**, 147-170.
- Campbell, K. S. W. & Barwick, R. E. (1990) Paleozoic dipnoan phylogeny: functional complexes and evolution without parsimony. *Paleobiology* **16**, 143-169.
- Canapa, A., Marota, F. R. & Olmo, E. (1999) The small-subunit rRNA gene sequences of venerids and the phylogeny of Bivalvia. *Journal of Molecular Evolution* **48**, 463-468.
- Canapa, A., Barucca, M., Marinelli, A. & Olmo, E. (2001) A molecular phylogeny of Heterodonta (Bivalvia) based on small ribosomal subunit RNA sequences. *Molecular Phylogenetics and Evolution* **21**, 156-161.
- Canapa, A., Barucca, M., Caputo, V., Marinelli, A., Cerioni, P. N., Olmo, E., Capriglione, T. & Odierna, G. (2000) A molecular analysis of the systematics of three Antarctic bivalves. *Italian Journal of Zoology* **67**, 127-132.
- Cao, Y., Adachi, J., Yano, T. & Hasegawa, M. (1994) Phylogenetic place of guinea pigs: no support of the rodent-poplyphyly hypothesis with maximum-likelihood analyses of multiple protein sequences. *Molecular Biology and Evolution* **11**, 593-604.

- Carlson, S. J. (1991). Phylogenetic relationships among brachiopod higher taxa (eds. D. I. MacKinnon, D. E. Lee & J. D. Campbell), pp. 3-10. Rotterdam: A. A. Balkema.
- Carpenter, J. M. (1986) Cladistics of the Chrysidoidea (Hymenoptera). *Journal of the New York Entomological Society* **94**, 303-330.
- Carr, R. K. (1991) Reanalysis of *Heintzichthys gouldii* (Newberry), an aspinothoracid arthrodire (Placodermi) from the Famennian of northern Ohio, with a review of brachythoracid systematics. *Zoological Journal of the Linnean Society* **103**, 349-390.
- Carr, R. K. (1995) Placoderm diversity and evolution. *Bulletin du Muséum National d'Histoire Naturel, Paris, 4ème Série* **17**, 85-125.
- Carroll, R. L. & Chorn, J. (1995) Vertebral development in the oldest microsauroid and the problem of 'lepospondyl' relationships. *Journal of Vertebrate Paleontology* **15**, 37-56.
- Carroll, R. L. & de Braga, M. (1992) Aigialosaurs: mid-Cretaceous varanoid lizards. *Journal of Vertebrate Paleontology* **12**, 66-86.
- Cerdeño, E. & Bond, M. (1998) Taxonomic revision and phylogeny of Paedotherium and Tremacyllus (Pachyrukhinae, Hegetotheriidae, Notoungulata) from the Late Miocene to the Pleistocene of Argentina. *Journal of Vertebrate Paleontology* **18**, 799-811.
- Chalifa, Y. & Tchernov, E. (1982) *Pachyamia latimaxillaris*, new genus and species (Actinopterygii: Amiidae), from the Cenomanian of Jerusalem. *Journal of Vertebrate Paleontology* **2**, 269-285.
- Chang, M. M. (1991). "Rhipidistians," dipnoans, and tetrapods In *Origins of the Higher Groups of Tetrapods* (eds. H. P. Schultze & L. Trueb), pp. 3-28. Ithaca, N.Y.: Cornell University Press.
- Chang, M. M. & Smith, M. M. (1992) Is *Youngolepis* a porolepiform? *Journal of Vertebrate Paleontology* **12**, 294-312.
- Chatterjee, S. (1986) *Malerisaurus langstoni*, a new diapsid reptile from the Triassic of Texas. *Journal of Vertebrate Paleontology* **6**, 297-312.
- Chevret, P., Denys, C., Jaeger, J. J., Michaux, J. & Catzeflis, F. M. (1993) Molecular evidence that the spiny mouse (*Acomys*) is more closely related to gerbils (Gerbillinae) than to true mice (Murinae). *Proceedings of the National Academy of Sciences* **90**, 3433-3436.
- Chiappe, L. M. & Calvo, J. O. (1994) *Neuquenornis volans*, a new Late Cretaceous bird (Enantiornithes: Avisauridae) from Patagonia, Argentina. *Journal of Vertebrate Paleontology* **14**, 230-246.
- Chiappe, L. M. & Dyke, G. J. (2002) The Mesozoic radiation of birds. *Annual Review of Ecology, Evolution, and Systematics* **33**, 91-124.
- Chinnery, B. J. & Weishampel, D. B. (1998) *Montanaceratops cerorhynchus* (Dinosauria: Ceratopsia) and relationships among basal neoceratopsians. *Journal of Vertebrate Paleontology* **18**, 569-585.
- Christoffersen, M. L. (1990) A new superfamily classification of the Caridea (Crustacea, Pleocyemata) based on phylogenetic pattern. *Zeitschrift für zoologische Systematik und Evolutionsforschung* **28**, 94-106.
- Cicero, C. & Johnson, N. K. (2001) Higher-level phylogeny of new world vireos (Aves: Vireonidae) based on sequences of multiple mitochondrial DNA genes. *Molecular Phylogenetics and Evolution* **20**, 27-40.
- Cisne, J. L. (1974) Trilobites and the origins of arthropods. *Science* **186**, 13-18.
- Claremont, M., Reid, D. G. & Williams, S. T. (2008) A molecular phylogeny of the Rapaninae and Ergalataxinae (Neogastropoda: Muricidae). *Journal of Molluscan Studies* **74**, 215-221.
- Clark, J. M. & Hernandez, R. R. (1994) A new burrowing diapsid from the Jurassic LaBoca Formation of Tamaulipas, Mexico. *Journal of Vertebrate Paleontology* **14**, 180-195.

- Clark, J. M., Welman, J., Gauthier, J. A. & Parrish, J. M. (1993) The laterosphenoid bone of early archosauriforms. *Journal of Vertebrate Paleontology* **13**, 48-57.
- Clarke, J. A., Norell, M. A. & Dashzeveg, D. (2005) New avian remains from the Eocene of Mongolia and the phylogenetic position of the Eogruidae (Aves, Gruoidea). *American Museum Novitates* **3494**, 1-17.
- Clarke, J. A. & Norell, M. A. (2002) The morphology and phylogenetic position of *Apsaravis ukhaana* from the Late Cretaceous of Mongolia. *American Museum Novitates* **3387**, 1-46. Clark, J. M. (1991) A new Early Miocene species of Paleoparadoxia (Mammalia: Desmostylia) from California. *Journal of Vertebrate Paleontology* **11**, 490-508.
- Clos, L. M. (1995) A new species of *Varanus* (Reptilia: Sauria) from the Miocene of Kenya. *Journal of Vertebrate Paleontology* **15**, 254-267.
- Coddington, J. A. & Levi, H. W. (1991) Systematics and evolution of spiders (Araneae). *Annual review of Ecology and Systematics* **22**, 565-592.
- Colgan, D. J., Ponder, W. F. & Egger, P. E. (2000) Gastropod evolutionary rates and phylogenetic relationships assessed using partial 28S rDNA and histone H3 sequences. *The Norwegian Academy of Science and Letters*, 29-43.
- Colgan, D. J., Ponder, W. F., Beacham, E. & Macaranas, J. (2007) Molecular phylogenetics of Caenogastropoda (Gastropoda: Mollusca). *Molecular Phylogenetics and Evolution* **42**, 717-737.
- Coombs, M. C. (1989). Interrelationships and diversity in the Chalicotheriidae In *The evolution of perissodactyls* (eds. D. R. Prothero & R. M. Schoch), pp. 438-457. New York: Clarendon Press.
- Coombs, W. P. & Maryanska, T. (1990). Ankylosauria In *The Dinosauria* (eds. D. B. Weishampel, P. Dodson & H. Osmólska), pp. 456-483. Berkeley: University of California Press.
- Cope, J. C. W. (1997) The early phylogeny of the Class Bivalvia. *Palaeontology*. **40**, 713-746.
- Coria, R. A. & Salgado, L. (1996) A basal iguanodontian (Ornithischia: Ornithomimidae) from the Late Cretaceous of South America. *Journal of Vertebrate Paleontology* **16**, 445-457.
- Court, N. (1990) Periosteal anatomy of *Arsimotherium* (Mammalia, Embrithopoda) and its phylogenetic implications. *Journal of Vertebrate Paleontology* **10**, 170-182.
- Court, N. (1995) A new species of *Numidotherium* (Mammalia: Proboscidea) from the Eocene of Libya and the early phylogeny of the Proboscidea. *Journal of Vertebrate Paleontology* **15**, 650-671.
- Courtney, G. W. (1990) Cuticular morphology of larval mountain midges (Diptera, Deuterophlebitidae): implications for the phylogenetic relationships of Nematocera. *Canadian Journal of Zoology* **68**, 556-578.
- Cracraft, J. (1988). The major clades of birds In *The Phylogeny and Classification of the Tetrapods* (ed. M. J. Benton), pp. 339-361. Oxford: Clarendon Press.
- Cracraft, J. (2001) Avian evolution, Gondwana biogeography and the Cretaceous-Tertiary mass extinction event. *Proceedings of the Royal Society, Series B* **268**, 459-469.
- Cracraft, J. & Helm-Bychowski, K. (1991). Parsimony and phylogenetic inference using DNA sequences: some methodological strategies In *Phylogenetic analysis of DNA sequences* (eds. M. M. Miyamoto & J. Cracraft), pp. 184-220. Oxford: Oxford University Press.
- Craske, A. J. & Jefferies, R. P. S. (1989) A new mite from the Upper Ordovician of Norway, and a new approach to subdividing a plesion. *Palaeontology* **32**, 69-99.
- Crespi, B., Careman, D., Vawter, L. & von Dohlen, C. (1996) Molecular phylogenetics of Thysanoptera. *Systematic Entomology* **21**, 79-87.

- Cripps, A. P. (1988) A new species of stem-group chordate from the Upper Ordovician of Northern Ireland. *Palaeontology* **31**, 1053-1077.
- Cumming, J. M., Sinclair, B. J. & Wood, M. (1995) Homology and phylogenetic implications of male genitalia in Diptera - Eremoneura. *Entomologica Scandinavica* **26**, 120-151.
- D'Erchia, A. M., Gissi, C., Pesole, G., Saccone, C. & Aranson, U. (1996) The guinea-pig is not a rodent. *Nature* **381**, 597-600.
- Daley, P. E. J. (1992) Two new cornutes from the Lower Ordovician of Shropshire and southern France. *Palaeontology* **35**, 127-148.
- David, B. (1988). Origins of the deep-sea holasteroid fauna In *Echinoderm Phylogeny and Evolutionary Biology* (eds. C. R. C. Paul & A. B. Smith), pp. 331-346. Oxford: Clarendon Press.
- Dayrat, B., Tillier, A., Lecointre, G. & Tillier, S. (2001) New clades of euthyneuran gastropods (Mollusca) from 28S rRNA sequences. *Molecular Phylogenetics and Evolution* **19**, 225-235.
- de Bonis, L., Koufos, G. D. & Sen, S. (1997) A giraffid from the Middle Miocene of the island of Chios, Greece. *Palaeontology* **40**, 121-133.
- de Braga, M. & Reisz, R. R. (1995) A new diapsid reptile from the uppermost Carboniferous (Stephanian) of Kansas. *Palaeontology* **38**, 199-212.
- de Braga, M. & Reisz, R. R. (1996) The Early Permian reptile *Acleistorhinus pteroticus* and its phylogenetic position. *Journal of Vertebrate Paleontology* **16**, 384-395.
- de Jong, R., Vane-Wright, R. I. & Ackery, P. R. (1996) The higher classification of butterflies (Lepidoptera): problems and prospects. *Entomologica Scandinavica* **27**, 65-101.
- De Jong, W. W., Leuinnessen, J. A. M. & Wistow, G. J. (1993). Eye lens crystallins and the phylogeny of placental orders: evidence for a macroselid-paenungulate clade. In *Mammal phylogeny: Placentals* (eds. F. S. Szalay, M. J. Novacek & M. C. McKenna), pp. 5-12. New York: Springer Verlag.
- Dean, J. & Smith, A. B. (1998) Palaeobiology of the primitive Ordovician pelmatozoan echinoderm *Cardiocystites*. *Palaeontology* **41**, 1183-1194.
- Dennis, K. & Miles, R. S. (1980) New durophagous arthrodires from Gogo, Western Australia. *Zoological Journal of the Linnean Society* **69**, 43-85.
- Denton Jr, R. K. & O'Neill, R. C. (1995) *Prototeius stageri* gen.et sp.nov., a new teiid lizard from the Upper Cretaceous Marshalltown Formation of New Jersey, with a preliminary phylogenetic revision of the Teiidae. *Journal of Vertebrate Paleontology* **1**, 235-253.
- Denton Jr, R. K. & O'Neill, R. C. (1998) *Parrisia neocesariensis*, a new batrachosauroidid salamander and other amphibians from the Campanian of eastern North America. *Journal of Vertebrate Paleontology* **18**, 484-494.
- Desui, M. (1991). On the origins of mammals In *Origins of the Higher Groups of Tetrapods* (eds. H. P. Schultze & L. Trueb), pp. 579-597. Ithaca, N.Y.: Cornell University Press.
- Dietrich, C. H. & Deitz, L. L. (1993) Superfamily Membracoidea (Homoptera: Auchenorrhyncha) II. Cladistic analysis and conclusions. *Systematic Entomology* **18**, 297-311.
- Dilkes, D. W. (1990) A new trematopsid amphibian (Temnospondyli: Dissorophoidea) from the Lower Permian of Texas. *Journal of Vertebrate Paleontology* **10**, 222-243.
- Dilkes, D. W. (1995) The rhynchosaur *Howesia browni* from the Lower Triassic of South Africa. *Palaeontology* **38**, 665-685.
- Din, W., David, B., Laurin, B., Chaline, J., Harada, M. & Catzeflis, F. (1993) DNA/ RNA hybridization study of the Clethrionomyini (Arvicolidae, Rodentia): comparison with morphological data. *Comptes rendus de l'Academie des Sciences, Paris, Serie II* **316**,

- 709-716.
- Dodick, J. T. & Modesto, S. P. (1995) The cranial anatomy of the captorhinid reptile *Labidosaurikos meachami* from the Lower Permian of Oklahoma. *Palaeontology* **38**, 687-711.
- Dodson, P. & Currie, P. J. (1990). *Neoceratopsia* In *The Dinosauria* (eds. D. B. Weishampel, P. Dodson & H. Osmólska), pp. 593-618. Berkeley: University of California Press.
- Dohle, W. (1985) Phylogenetic pathways in the Chilopoda. *Bijdragen tot de Dierkunde* **55**, 55-66.
- Domning, D. P. (1989) Fossil Sirenia of the West Atlantic and Caribbean region II. *Dioplotherium manigaulti* Cope, 1883. *Journal of Vertebrate Paleontology* **9**, 415-428.
- Donald, K. M., Kennedy, M. & Spencer, H. G. (2005) The phylogeny and taxonomy of austral monodontine topshells (Mollusca: Gastropoda: Trochidae), inferred from DNA sequences. *Molecular Phylogenetics and Evolution* **37**, 474-483.
- Donne-Goussé, C., Laudet, V. & Hänni, C. (2002) A molecular phylogeny of anseriformes based on mitochondrial DNA analysis. *Molecular Phylogenetics and Evolution* **23**, 339-356.
- Doucet-Beaupré, H., Breton, S., Chapman, E. G., Blier, P. U., Bogan, A. E., Stewart, D. T. & Hoeh, W. R. (2010) Mitochondrial phylogenomics of the Bivalvia (Mollusca): searching for the origin and mitogenomic correlates of doubly uniparental inheritance of mtDNA. *BMC Evolutionary Biology* **10**, 1-19.
- Donovan, S. K. (1988). The early evolution of the Crinoidea In *Echinoderm Phylogeny and Evolutionary Biology* (eds. C. R. C. Paul & A. B. Smith), pp. 235-244. Oxford: Clarendon Press.
- Douzery, E. (1993) Evolutionary relationships among Cetacea based on the sequence of the mitochondrial rRNA gene: possible paraphyly of toothed-whales (Odontocetes) and long separate evolution of sperm whales (Physteridae). *Comptes rendus de l'Académie des Sciences, Paris, Sciences de la Vie* **316**, 1511-1518.
- Duncan, I. (1996) (PhD, University of Bristol).
- Dunlop, J. A. & Selden, P. A. (1998). The early history and phylogeny of the chelicerates In *Arthropod Relationships* (eds. R. A. Fortey & R. H. Thomas), pp. 221-235. London: Chapman & Hall.
- Durham, J. W. (1966). Clypeasteroids In *Treatise on Invertebrate Paleontology* (ed. R. C. Moore), pp. U450-U491. Lawrence, Kansas: Geological Society of America and University of Kansas Press.
- Easteal, S. (1990) The pattern of mammalian evolution and the relative rate of molecular evolution. *Genetics* **124**, 165-173.
- Edmunds, G. F. (1962) The principles applied in determining the hierarchic level of the higher categories of Ephemeroptera. *Systematic Zoology* **11**, 22-31.
- Emlet, R. B. (1988). Crystallographic axes of echinoid genital plates reflect larval form: some phylogenetic implications In *Echinoderm Phylogeny and Evolutionary Biology* (eds. C. R. C. Paul & A. B. Smith), pp. 299-310. Oxford: Clarendon Press.
- Emslie, S. D. (1988) The fossil history and phylogenetic relationships of condors (Ciconiiformes: Vulturidae) in the New World. *Journal of Vertebrate Paleontology* **8**, 212-228.
- Enghoff, H. (1981) A cladistic-analysis and classification of the millipede Order Julida. *Zeitschrift für zoologische Systematik und Evolutionsforschung* **19**, 285-319.
- Enghoff, H. (1991) A revised cladistic-analysis and classification of the millipede Order Julida - with establishment of four new families and description of a new nemasomatoid genus from Japan. *Zeitschrift für zoologische Systematik und*



- Evolutionsforschung* **29**, 241-263.
- Ensom, P. C. & Sigogneau-Russell, D. (1998) New dryolestoid mammals from the basal Cretaceous Purbeck Limestone Group of southern England. *Palaeontology* **41**, 35-55.
- Ericson, P. G. P., Parsons, T. J. & Johansson, U. S. (2001) Morphological and molecular support for nonmonophyly of the Galloanserae. *New perspectives on the origin and early evolution of birds: Proceedings of the International Symposium in Honor of John H. Ostrom*, 157-168.
- Ericson, P. G. P., Anderson, C. L., Britton, T., Elzanowski, A., Johansson, U. S., Källersjö, M., Ohlson, J. I., Parsons, T. J., Zuccon, D. & Mayr, G. (2006) Diversification of Neoaves: integration of molecular sequence data and fossils. *Biology Letters* **2**, 543-547.
- Estes, R., de Queiroz, K. & Gauthier, J. A. (1988). Phylogenetic relationships within Squamata In *Phylogenetic Relationships of the Lizard Families. Essays Commemorating Charles L. Camp* (eds. R. Estes & G. Pregill), pp. 119-281. Stanford: Stanford University Press.
- Etheridge, R. & de Queiroz, K. (1988). A phylogeny of Iguanidae In *Phylogenetic Relationships of the Lizard Families. Essays Commemorating Charles L. Camp* (eds. R. Estes & G. Pregill), pp. 283-368. Stanford: Stanford University Press.
- Evander, R. L. (1989). Phylogeny of the Family Equidae In *The Evolution of Perissodactyls* (eds. D. R. Prothero & R. M. Schoch), pp. 109-126. New York: Clarendon Press.
- Evans, S. E. (1988). The early history and relationships of the Diapsida In *The Phylogeny and Classification of the Tetrapods* (ed. M. J. Benton), pp. 221-260. Oxford: Clarendon Press.
- Evans, S. E. (1994) A new anguimorph lizard from the Jurassic and Lower Cretaceous of England. *Palaeontology* **37**, 33-49.
- Evans, S. E. & Chure, D. C. (1998) Paramacellodid lizard skulls from the Jurassic Morrison Formation at Dinosaur National Monument, Utah. *Journal of Vertebrate Paleontology* **18**, 99-114.
- Fain, M. G., Krajewski, C. & Houde, P. (2007) Phylogeny of "core Gruiformes" (Aves: Grues) and resolution of the Limpkin-Sungrebe problem. *Molecular Phylogenetics and Evolution* **43**, 515-529.
- Feral, J. P. & Derelle, E. (1990). In *Echinoderm Biology* (ed. T. Yanagisawa), pp. 331-338. Rotterdam: A. A. Balkema.
- Fink, S. V. & Fink, W. L. (1981) Interrelationships of the ostariophysan fishes (Teleostei). *Zoological Journal of the Linnean Society* **72**, 297-353.
- Flynn, J. J., Neff, N. A. & Tedford, R. H. (1988). Phylogeny of the Carnivora In *The Phylogeny and Classification of the Tetrapods* (ed. M. J. Benton), pp. 73-116. Oxford: Clarendon Press.
- Ford, S. M. & Morgan, G. S. (1986) A new ceboid femur from the Late Pleistocene of Jamaica. *Journal of Vertebrate Paleontology* **6**, 281-289.
- Foreman, B. C. (1990) A revision of the cranial morphology of the Lower Permian temnospondyl amphibian *Acropylous vorax* Hotton. *Journal of Vertebrate Paleontology* **10**, 390-397.
- Forey, P. L. (1987). Relationships of lungfishes In *The Biology and Evolution of Lungfishes* (eds. W. E. Bemis, W. W. Burggren & N. E. Kemp), pp. 75-91. New York: Alan R. Liss.
- Forey, P. L. (1987) The Downtonian ostracoderm *Sclerodus* Agassiz (Osteostraci: Tremataspidae). *Bulletin of the British Museum (Natural History), Geology Series* **41**, 1-30.
- Forey, P. L. (1988) Golden jubilee for the coelacanth *Latimeria chalumnae*. *Nature* **336**, 727-

- 732.
- Forey, P. L. (1991) *Latimeria chalumnae* and its pedigree. *Environmental Biology of Fishes* **32**, 75-97.
- Forey, P. L. & Gardiner, B. G. (1986) Observations on *Ctenurella* (Ptyctodontida) and the classification of placoderm fishes. *Zoological Journal of the Linnean Society* **86**, 43-74.
- Forey, P. L., Gardiner, B. G. & Patterson, C. (1991). The lungfish, the coelacanth and the cow revisited In *Origins of the Higher Groups of Tetrapods* (eds. H. P. Schultze & L. Trueb), pp. 145-173. Ithaca, N.Y.: Cornell University Press.
- Forey, P. L. & Janvier, P. (1993) Agnathans and the origin of jawed vertebrates. *Nature* **361**, 129-134.
- Forster, C. A. (1990) The postcranial skeleton of the ornithomimid dinosaur *Tenontosaurus tilletti*. *Journal of Vertebrate Paleontology* **10**, 273-294.
- Forster, C. A. (1996) Species resolution in Triceratops: cladistic and morphometric approaches. *Journal of Vertebrate Paleontology* **16**, 259-270.
- Fortey, R. A. (1990) Ontogeny, hypostome attachment and trilobite classification. *Palaeontology* **33**, 529-576.
- Fortey, R. A. & Whittington, H. B. (1989) The Trilobita as a natural group. *Historical Biology* **2**, 125-138.
- Fountaine, T. M. R., Benton, M. J., Dyke, G. J. & Nudds, R. L. (2005) the quality of the fossil record of Mesozoic birds. *Proceedings of the Royal Society, Series B* **272**, 289-294.
- Friedlander, T. P., Regier, J. C., Mitter, C. & Wagner, D. L. (1996) A nuclear gene for higher level phylogenetics: phosphoenolpyruvate carboxykinase tracks Mesozoic-age divergences within Lepidoptera (Insecta). *Molecular Biology and Evolution* **13**, 594-604.
- Gaffney, E. S. (1975) A phylogeny and classification of the higher categories of turtles. *Bulletin of the American Museum of Natural History* **155**, 387-436.
- Gaffney, E. S. (1979) Tetrapod monophyly: a phylogenetic analysis. *Bulletin of the Carnegie Museum of Natural History* **13**, 92-105.
- Gaffney, E. S. (1984). Progress towards a natural hierarchy of turtles In *Studia Palaeocheloniologica I* (eds. E. F. de Broin & E. Jiménez-Fuentes), pp. 125- 131. Salamanca: Universidad de Salamanca.
- Gaffney, E. S. & Meeker, L. J. (1983) Skull morphology of the oldest turtles: a preliminary description of *Proganochelys quenstedti*. *Journal of Vertebrate Paleontology* **3**, 25-28.
- Gaffney, E. S. & Meylan, P. A. (1988). A phylogeny of turtles In *The Phylogeny and Classification of the Tetrapods* (ed. M. J. Benton), pp. 157-219. Oxford: Clarendon Press.
- Gale, A. S. (1987) Phylogeny and classification of the Asterozoa (Echinodermata). *Zoological Journal of the Linnean Society* **89**, 107-132.
- Galton, P. M. (1990). Basal Sauropodomorpha - prosauropods In *The Dinosauria* (eds. D. B. Weishampel, P. Dodson & H. Osmólska), pp. 320-344. Berkeley: University of California Press.
- Gardiner, B. G. (1982) Tetrapod classification. *Zoological Journal of the Linnean Society* **74**, 207-232.
- Gardiner, B. G. (1983) Gnathostome vertebrae and the classification of the Amphibia. *Zoological Journal of the Linnean Society* **79**, 1-59.
- Gardiner, B. G. (1984) The relationship of placoderms. *Journal of Vertebrate Paleontology* **4**, 379-395.

- Gardiner, B. G. (1984) The relationships of the palaeoniscid fishes, a review based on new specimens of *Mimia* and *Moythomasia* from the Upper Devonian of Western Australia. *Bulletin of the British Museum (Natural History), Geology Series* **37**, 173-428.
- Gardiner, B. G. & Miles, R. S. (1994) Eubrachythoracid arthrodiros from Gogo, Western Australia. *Zoological Journal of the Linnean Society* **112**, 443-477.
- Gardiner, B. G. & Schaeffer, B. (1989) Interrelationships of lower actinopterygian fishes. *Zoological Journal of the Linnean Society* **97**, 135-187.
- Gasparini, Z., Chiappe, L. M. & Fernandez, M. (1991) A new Senonian peirosaurid (Crocodylomorpha) from Argentina and a synopsis of the South American Cretaceous crocodylians. *Journal of Vertebrate Paleontology* **11**, 316-333.
- Gaudin, T. J. (1991) A re-examination of elasmobranch monophyly and chondrichthyan phylogeny. *Neues Jahrbuch für Geologie und Paläontologie, Abhandlungen* **182**, 133-160.
- Gaudin, T. J. (1995) The ear region of edentates and the phylogeny of the Tardigrada (Mammalia: Xenarthra). *Journal of Vertebrate Paleontology* **15**, 672-705.
- Gauthier, J. (1986) Saurischian monophyly and the origin of birds. *Memoirs of the California Academy of Sciences* **8**, 1-55.
- Gauthier, J. A., Estes, R. & de Queiroz, K. (1988). A phylogenetic analysis of Lepidosauromorpha In *Phylogenetic Relationships of the Lizard Families. Essays Commemorating Charles L. Camp* (eds. R. Estes & G. Pregill), pp. 15-98. Stanford: Stanford University Press.
- Gauthier, J. A., Kluge, A. G. & Rowe, T. (1988). The early evolution of the Amniota In *The Phylogeny and Classification of the Tetrapods* (ed. M. J. Benton), pp. 103-156. Oxford: Clarendon Press.
- Gauthier, J. A., Kluge, A. G. & Rowe, T. (1988) Amniote phylogeny and the importance of fossils. *Cladistics* **4**, 105-209.
- Gee, H. (1990) Fossil fishes and fashion. *Nature* **348**, 194-195.
- Geiger, D. L. & Thacker, C. E. (2005) Molecular phylogeny of Vetigastropoda reveals non-monophyletic Scissurellidae, Trochoidea, and Fissurelloidea. *Molluscan Research* **25**, 47-55.
- Gemmell, N. J. & Westerman, M. (1994) Phylogenetic relationships within the Class Mammalia: a study using mitochondrial 12S RNA sequences. *Journal of Mammalian Evolution* **2**, 3-23.
- Gentry, A. W. & Hooker, J. J. (1988). The phylogeny of the Artiodactyla In *The Phylogeny and Classification of the Tetrapods* (ed. M. J. Benton), pp. 235-272. Oxford: Clarendon Press.
- Geraads, D. & Güleç, E. (1997) Relationships of *Barbourofelis piveteaui* (Ozansoy, 1965), a Late Miocene nimravid (Carnivora, Mammalia) from Central Turkey. *Journal of Vertebrate Paleontology* **17**, 370-375.
- Gomani, E. M. (1997) A crocodyliform from the Early Cretaceous Dinosaur Beds, northern Malawi. *Journal of Vertebrate Paleontology* **17**, 280-294.
- Good, D. A. (1988) The phylogenetic position of fossils assigned to the Gerrhonotinae (Squamata: Anguillidae). *Journal of Vertebrate Paleontology* **8**, 188-195.
- Goodman, M., Czelusniak, J. & Beeber, J. E. (1985) Phylogeny of Primates and other eutherian orders: a cladistic analysis using amino acid and nucleotide sequence data. *Cladistics* **1**, 171-185.
- Goujet, D. F. (1984) Placoderm interrelationships: a new interpretation, with a short review of placoderm classifications. *Proceedings of the Linnean Society of New South Wales* **107**, 211-243.

- Gower, D. J. & Sennikov, A. G. (1996) Morphology and phylogenetic informativeness of early archosaur braincases. *Palaeontology* **39**, 883-906.
- Gower, D. J. & Sennikov, A. G. (1997) Sarmatosuchus and the early history of the Archosauria. *Journal of Vertebrate Paleontology* **17**, 60-73.
- Graf, D. L. & Cummings, K. S. (2007) Review of the systematics and global diversity of freshwater mussel species (Bivalvia: Unionoida). *Journal of Molluscan Studies* **73**, 291-314.
- Grande, L. (1985) Recent and fossil clupeomorph fishes with materials for revision of the subgroups of clupeoids. *Bulletin of the American Museum of Natural History* **181**, 231-372.
- Grande, L. (1988) A well preserved paracanthopterygian fish (Teleostei) from freshwater Lower Paleocene deposits of Montana. *Journal of Vertebrate Paleontology* **8**, 117-130.
- Grande, C., Templado, J. & Zardoya, R. (2008) Evolution of gastropod mitochondrial genome arrangements. *BMC Evolutionary Biology* **8**, 1-15.
- Grande, C., Templado, J., Cervera, J. L. & Zardoya, R. (2004) Phylogenetic relationships among Opisthobranchia (Mollusca: Gastropoda) based on mitochondrial *cox 1*, *trnV*, and *rrnL* genes. *Molecular Phylogenetics and Evolution* **33**, 378-388.
- Graur, D. (1993) Molecular phylogeny and the higher classification of eutherian mammals. *Trends in Ecology and Evolution* **8**, 141-147.
- Graur, D., Hide, W. A. & Li, W. H. (1991) Is the guinea-pig a rodent? *Nature* **351**, 649-652.
- Graur, D. & Higgins, D. G. (1994) Molecular evidence for the inclusion of cetaceans within the Order Artiodactyla. *Molecular Biology and Evolution* **11**, 357-364.
- Greenwald, N. S. (1988) Patterns of tooth eruption and replacement in multituberculate mammals. *Journal of Vertebrate Paleontology* **8**, 265-277.
- Gretarsdottir, S. & Aranson, U. (1993) Molecular studies on two variant repeat types of the common cetacean DNA satellite of the Sperm whale, and the relationship between Physteridae (Sperm whales) and Ziphiidae (Beaked whales). *Molecular Biology and Evolution* **10**, 306-318.
- Griffiths, G. C. D. (1976) The future of Linnean nomenclature. *Systematic Zoology* **25**, 168-173.
- Grismer, L. L. (1988). Phylogeny, taxonomy, classification, and biogeography of eublepharid geckos In *Phylogenetic Relationships of the Lizard Families. Essays Commemorating Charles L. Camp* (eds. R. Estes & G. Pregill), pp. 369-470. Stanford: Stanford University Press.
- Haas, F. (1995) The phylogeny of the Forficulina, a suborder of the Dermaptera. *Systematic Entomology* **20**, 85-98.
- Haddrath, O. & Baker, A. J. (2001) Complete mitochondrial DNA genome sequences of extinct birds: ratite phylogenetics and the vicariance biogeography hypothesis. *Proceedings of the Royal Society, Series B* **268**, 939-945.
- Halstead, L. B. (1982). Evolutionary trends and the phylogeny of the Agnatha In *Problems of Phylogenetic Reconstruction* (eds. K. A. Joysey & A. E. Friday), pp. 159-196. London: Academic Press.
- Harasewych, M. G., Adamkewicz, S. L., Plassmeyer, M. & Gillevet, P. M. (1998) Phylogenetic relationships of the lower Caenogastropoda (Mollusca, Gastropoda, Architaenioglossa, Campaniloidea, Cerithioidea) as determined by partial 18s rDNA sequences. *Zoologica Scripta* **27**, 361-372.
- Harper, D. A. T. (2000). Dalmanellidina In *Treatise on Invertebrate Paleontology* (eds. A. Williams, C. H. C. Brunton & S. J. Carlson. Boulder, Colorado: Geological Society of America and University of Kansas.

- Harper, E. M., Hide, E. A. & Morton, B. (2000) Relationships between the extant Anomalodesmata: a cladistic test. *Geological Society of London Special Publications* **177**, 129-143.
- Harshman, J., Braun, E. L., Braun, M. J., Huddleston, C. J., Bowie, R. C. K., Chojnowski, J. L., Hackett, S. J., Han, K-L., Kimball, R. T., Marks, B. D., Miglia, K. J., Moore, W. S., Reddy, S., Sheldon, F. H., Steadman, D. W., Stepan, S. J., Christopher C. Witt, C. C. & Yuri, T. (2008) Phylogenomic evidence for multiple losses of flight in ratite birds. *Proceedings of the National Academy of Sciences of the United States of America* **105**, 13462-13467.
- Harzhauser, M., Mandic, O. & Zuschin, M. (2003) Changes in Parathethyan marine molluscs at the Early/Middle Miocene transition: diversity, palaeogeography and palaeoclimate. *Acta Geologica Polonica* **53**, 323-339.
- Harzhauser, M., Mandic, O., Piller, W.E., Reuter, M. & Kroh, A. (2008) Tracing back the origin of the Indo-Pacific Mollusc fauna: basal Tridacninae from the Oligocene and Miocene of the Sultanate of Oman. *Palaeontology* **51**, 199-213.
- Hayashi, S. (2005) The molecular phylogeny of the Buccinidae (Caenogastropoda : Neogastropoda) as inferred from the complete mitochondrial 16S rRNA gene sequences of selected representatives. *Molluscan Research* **25**, 85-98.
- Head, J. J. (1998) A new species of basal hadrosaurid (Dinosauria, Ornithischia) from the Cenomanian of Texas. *Journal of Vertebrate Paleontology* **18**, 718-738.
- Heb, M., Beck, F., Gensler, H., Kano, Y., Kiel, S. & Haszprunar, G. (2008) Microanatomy, shell structure and molecular phylogeny of *Leptogyra*, *Xyleptogyra* and *Leptogyropsis* (Gastropoda: Neomphalida: Melanodrymiidae) from sunken wood. *Journal of Molluscan Studies* **74**, 383-401.
- Hedegaard, C. (1997) Shell Structures of the Recent Vetigastropoda. *Journal of Molluscan Studies* **63**, 369-377.
- Hedges, S. B. & Sibley, C. G. (1994) Molecules vs. morphology in avian evolution: the case of the "pelecaniform" birds. *Proceedings of the National Academy of Sciences of the United States of America* **91**, 9861-9865.
- Heie, O. E. (1987). Palaeontology and phylogeny. In *Aphids: their biology, natural enemies, and control* (eds. A. K. Minks & P. Harrewijn). Amsterdam: Elsevier.
- Heimer, S. & Nentwig, W. (1982) Thoughts on the phylogeny of the Araneoidea Latreille, 1806 (Arachnida, Araneae). *Zeitschrift für zoologische Systematik und Evolutionsforschung* **20**, 284-295.
- Heissig, K. (1989). The Rhinocerotidae In *The Evolution of Perissodactyls* (eds. D. R. Prothero & R. M. Schoch), pp. 399-417. New York: Clarendon Press.
- Henrici, A. C. (1998) A new pipoid anuran from the Late Jurassic Morrison Formation at Dinosaur National Monument, Utah. *Journal of Vertebrate Paleontology* **18**, 321-332.
- Henry, J. L. (1984) Analyse cladistique et Trilobites: un point de vue. *Lethaia* **17**, 61-66.
- Hermanson, J. W. & MacFadden, B. J. (1992) Evolutionary and functional morphology of the shoulder region and stay-apparatus in fossil and extant horses (Equidae). *Journal of Vertebrate Paleontology* **12**, 377-286.
- Hermanson, J. W. & MacFadden, B. J. (1996) Evolutionary and functional morphology of the knee in fossil and extant horses (Equidae). *Journal of Vertebrate Paleontology* **16**, 349-357.
- Heymer, A. (1975) Der stammesgeschichtliche augesswert der Pterostigma-Oberfldchenfeinstruktur bei Odonaten. *Zeitschrift für zoologische Systematik und Evolutionsforschung* **13**, 81-91.
- Ho, J. S. (1994) Copepod phylogeny: a reconsideration of Huys and Boxshall's "parsimony versus homology". *Hydrobiologia* **292**, 31-39.

- Holbrook, L. T. & Lucas, S. G. (1997) A new genus of rhinocerotoid from the Eocene of Utah and the status of North American "Forstercooperia". *Journal of Vertebrate Paleontology* **17**, 384-396.
- Holmes, R. (1996) Plioplatecarpus primaevus (Mosasauridae) from the Bearpaw Formation (Campanian, Upper Cretaceous) of the North American western interior seaway. *Journal of Vertebrate Paleontology* **16**, 673-687.
- Holmes, R. B., Carroll, R. L. & Reisz, R. R. (1998) The first articulated skeleton of Dendrerpeton acadianum (Temnospondyli, Dendrerpetontidae) from the Lower Pennsylvanian locality of Joggins, Nova Scotia, and a review of its relationships. *Journal of Vertebrate Paleontology* **18**, 64-79.
- Holtz Jr, T. R. (1994) The arctometatarsalian pes, an unusual structure of the metatarsus of Cretaceous Theropoda (Dinosauria: Saurischia). *Journal of Vertebrate Paleontology* **14**, 480-519.
- Honey, J. G. (1990) New Washakiin primates (Omomyidae) from the Eocene of Wyoming and Colorado, and comments on the evolution of the Washakiini. *Journal of Vertebrate Paleontology* **10**, 206-221.
- Honeycutt, R. L. & Adkins, R. M. (1993) Higher level systematics of eutherian mammals: an assessment of molecular characters and phylogenetic hypotheses. *Annual Review of Ecology and Systematics* **24**, 279-305.
- Hooker, J. J. (1989). Character polarities in early perissodactyls and their significance for Hyracotherium and infraordinal relationships In *The Evolution of Perissodactyls* (eds. D. R. Prothero & R. M. Schoch), pp. 79-101. New York: Clarendon Press.
- Hooks, G. E. (1998) Systematic revision of the Protostegidae, with a redescription of Calcarichelys gemma Zangerl, 1953. *Journal of Vertebrate Paleontology* **18**, 85-98.
- Hopson, J. A. (1991). Systematics of the nonmammalian Synapsida and implications for patterns of evolution in synapsids In *Origins of the Higher Groups of Tetrapods* (eds. H. P. Schultze & L. Trueb), pp. 635-693. Ithaca, N.Y.: Cornell University Press.
- Hopson, J. A. & Barghusen, H. R. (1986). An analysis of therapsid relationships In *The Ecology and Biology of Mammal-like Reptiles* (eds. N. N. Hotton, III, P. D. MacLean, J. J. Roth & E. C. Roth), pp. 83-106. Washington, D. C.: Smithsonian Institution Press.
- Hospitaleche, C. A., Tambussi, C., Donato, M. & Cozzuol, M. (2007) A new Miocene penguin from Patagonia and its phylogenetic relationships. *Acta Palaeontologica Polonica* **52**, 299-314.
- Hou, X. & Bergstrom, J. (1995) Cambrian lobopodians - ancestors of extant onychophorans. *Zoological Journal of the Linnean Society* **114**, 3-19.
- Howland, D. E. & Hewitt, G. M. (1995) Phylogeny of the Coleoptera based on mitochondrial cytochrome oxidase I sequence data. *Insect Molecular Biology* **4**, 203-215.
- Hulbert, R. C., Jr. (1989). Phylogenetic interrelationships and evolution of North American late Neogene Equidae In *The Evolution of Perissodactyls* (eds. D. R. Prothero & R. M. Schoch), pp. 176-196. New York: Clarendon Press.
- Hutchinson, J. H. (1991) Early Kinosterninae (Reptilia: Testudines) and their phylogenetic significance. *Journal of Vertebrate Paleontology* **11**, 145-167.
- Huys, R. & Boxshall, G. A. (1991) *Copepod Evolution*. London: The Ray Society.
- Irwin, D. M. & Arnason, U. (1994) Cytochrome b gene of marine mammals: phylogeny and evolution. *Journal of Mammalian Evolution* **2**, 37-55.
- Jaeger, J. J. (1988). Rodent phylogeny: new data and old problems In *The Phylogeny and Classification of the Tetrapods* (ed. M. J. Benton. Oxford: Clarendon Press.
- Jalil, N. E. (1997) A new prolacertiform diapsid from the Triassic of North Africa and the interrelationships of the Prolacertiformes. *Journal of Vertebrate Paleontology* **17**,

- 506-525.
- Janis, C. M. (1987) Grades and clades in hornless ruminant evolution: the reality of the Gelocidae and the systematic position of Lophiomeryx and Bachitherium. *Journal of Vertebrate Paleontology* **7**, 200-216.
- Janis, C. M. & Scott, K. M. (1988). The phylogeny of the Ruminantia (Artiodactyla, Mammalia) In *The Phylogeny and Classification of the Tetrapods* (ed. M. J. Benton. Oxford: Clarendon Press.
- Janvier, P. (1981) The phylogeny of the Craniata, with particular reference to the significance of fossil "agnathans". *Journal of Vertebrate Paleontology* **1**, 121-159.
- Janvier, P. (1984) The relationships of the Osteostraci and Galeaspida. *Journal of Vertebrate Paleontology* **4**, 344-358.
- Janvier, P. (1985) Les thyestidiens (Osteostraci) du Silurien de Saaremaa (Estonie).Deuxième partie: Analyse phylogénétique, repartition stratigraphique, remarques sur les genres Auchenaspis, Timanaspis, Tyriaspis, Didymaspis, Sclerodus et Tannuaspid. *Annales de Paléontologie (Vertébrés-Invertébrés)* **71**, 187-216.
- Janvier, P. & Blicek, A. (1993) L.B.Halstead and the heterostracan controversy. *Modern Geology* **18**, 89-105.
- Janvier, P. & Jiang, P. (1982) Hyrcanaspid bliecki n.g.n.sp., a new primitive euantiarch (Antiarcha: Placodermi) from the Middle Devonian of northeastern Iran, with a discussion of antiarch phylogeny. *Neues Jahrbuch für Geologie und Paläontologie, Abhandlungen* **164**, 364-392.
- Janvier, P. & Lund, R. (1983) Hardistiella montanensis n. gen. et sp. (Petromyzontida) from the Lower Carboniferous of Montana, with remarks on the affinities of the lampreys. *Journal of Vertebrate Paleontology* **2**, 407-413.
- Janvier, P. & Lund, R. (1983) Hardistiella montanensis n. gen. et sp.(Petromyzontida) from the Lower Carboniferous of Montana, with remarks on the affinities of the lampreys. *Journal of Vertebrate Paleontology* **2**, 407-413.
- Jefferies, R. P. S. (1986) *The ancestry of the vertebrates*. London: British Museum (Natural History).
- Jefferies, R. P. S. (1990) The solute Dendrocystoides scoticus from the Upper Ordovician of Scotland and the ancestry of chordates and echinoderms. *Palaeontology* **33**, 631-679.
- Jensen, M. (1981) Morphology and classification of the Euechinoidea Bronn, 1860 - a cladistic analysis. *Videnskabelige Meddelelser fra Dansk Naturhistorisk Forening i Kjobenhavn* **143**, 7-99.
- Jeram, A. J. (1994) Scorpions from the Visian of East Kirkton, West Lothian, Scotland, with a revision of the infraorder Mesoscorpionina. *Transactions of the Royal Society of Edinburgh* **84**, 283-299.
- Jermann, T. M., Opitz, J. G., Stackhouse, J. & Benner, S. A. (1995) Reconstructing the evolutionary history of the artiodactyl ribonuclease superfamily. *Nature* **374**, 57-59.
- Johnson, K. G. (1998) A phylogenetic test of accelerated turnover in Neogene Caribbean brain corals (Scleractinia: Faviidae). *Palaeontology* **41**, 1247-1268.
- Kano, Y., Chiba, S. & Kase, T. (2002) Major adaptive radiation in neritopsine gastropods estimated from 28S rRNA sequences and fossil records. *Proceedings of the Royal Society, Series B* **269**, 2457-2465.
- Kavanaugh, D. H. (1986) A systematic review of amphizoid beetles (Amphizoidae: Coleoptera) and their phylogenetic relationships to other Adephaga. *Proceedings of the California Academy of Sciences* **44**, 67-109.
- Kemp, T. S. (1982) *Mammal-like Reptiles and the Origin of Mammals*. London: Academic Press.
- Kemp, T. S. (1988). Interrelationships of the Synapsida In *The Phylogeny and Classification*

- of the Tetrapods* (ed. M. J. Benton. Oxford: Clarendon Press.
- Kenrick, P. & Crane, P. R. (1997) *The origin and early diversification of land plants: a cladistic study*. Washington, D.C.: Smithsonian Institution Press.
- King, D. G. (1991) The origin of an organ: phylogenetic analysis of evolutionary innovation in the digestive tract of flies (Insecta: Diptera). *Evolution* **45**, 568-588.
- Kinzelbach, R. & Pohl, H. (1994) The fossil Strepsiptera (Insecta: Strepsiptera). *Annals of the Entomological Society of America* **87**, 59-70.
- Kobayashi, Y. & Ando, H. (1988) Phylogenetic relationships among the lepidopteran and trichopteran suborders (Insecta) from the embryological standpoint. *Zeitschrift für zoologische Systematik und Evolutionsforschung* **26**, 186-210.
- Kohno, N. (1994) A new Miocene pinniped in the genus Prototaria (Carnivora: Odobenidae) from the Moniwa Formation, Miyagi, Japan. *Journal of Vertebrate Paleontology* **14**, 414-426.
- Korn, D. (1997) Evolution of the Goniatitaceae and Visean-Namurian biogeography. *Acta Palaeontologica Polonica* **42**, 177-199.
- Korth, W. W. (1993) Review of the Oligocene (Orellan and Arikareean) genus Tenudomys Rensberger (Rodentia: Geomyoidea). *Journal of Vertebrate Paleontology* **13**, 335-341.
- Korth, W. W. (1996) A new species of Pleurolocus (Rodentia, Geomyidae) from the Early Miocene (Arikareean) of Nebraska. *Journal of Vertebrate Paleontology* **16**, 781-784.
- Korth, W. W., Wahlert, J. H. & Emry, R. J. (1991) A new species of Heliscomys and recognition of the family Heliscomyidae (Geomyoidea: Rodentia). *Journal of Vertebrate Paleontology* **11**, 247-256.
- Krajewski, C., Driskell, A. C., Baverstock, P. R. & Braun, M. J. (1992) Phylogenetic relationships of the thylacine (Mammalia: Thylacinidae) among dasyuroid marsupials: evidence from cytochrome b DNA sequences. *Proceedings of the Royal Society, Series B* **250**, 19-27.
- Krajewski, C., Painter, J., Buckley, L. & Westerman, M. (1994) Phylogenetic structure of the marsupial family Dasyuridae based on cytochrome b DNA sequences. *Journal of Mammalian Evolution* **2**, 25-35.
- Kristensen, N. P. (1975) *Zeitschrift für zoologische Systematik und Evolutionsforschung*. **13**, 1-44.
- Kristensen, N. P. (1976) Remarks on the family-level phylogeny of butterflies (Insecta, Lepidoptera, Rhopalocera). *Zeitschrift für zoologische Systematik und Evolutionsforschung* **14**, 25-33.
- Ksepka, D. T., Bertelli, S. & Giannini, N. P. (2006) The phylogeny of the living and fossil Sphenisciformes (penguins). *Cladistics* **22**, 412-441.
- Kukalova-Peck, J. & Peck, S. B. (1993) Zoraptera wing structures: evidence for new genera and relationships within the blattoid orders (Insecta: Blattoneoptera). *Systematic Entomology* **18**, 333-350.
- Lauder, G. V. & Liem, K. F. (1983) The evolution and interrelationships of the actinopterygian fishes. *Bulletin of the Museum of Comparative Zoology* **150**, 95-197.
- Laurin, M. (1991) The osteology of a Lower Permian eosuchian from Texas and a review of diapsid phylogeny. *Zoological Journal of the Linnean Society* **101**, 59-95.
- Laurin, M. (1993) Anatomy and relationships of Haptodus garnettensis, a Pennsylvanian synapsid from Kansas. *Journal of Vertebrate Paleontology* **13**, 200-229.
- Laurin, M. (1996) A reappraisal of Utegenia, a Permo-Carboniferous seymouriamorph (Tetrapoda: Batrachosauria) from Kazakhstan. *Journal of Vertebrate Paleontology* **16**, 374-383.
- Lebedev, O. A. & Coates, M. I. (1995) The postcranial skeleton of the Devonian tetrapod



- Tulerpeton curtum Lebedev. *Zoological Journal of the Linnean Society* **114**.
- Lee, M. S. Y., Gow, C. E. & Kitching, J. W. (1997) Anatomy and relationships of the pareiasaur *Pareiasuchus nasicornis* from the Upper Permian of Zambia. *Palaeontology* **40**, 307-335.
- Lee, Y. N. (1996) A new nodosaurid ankylosaur (Dinosauria: Ornithischia) from the Paw Paw Formation (Late Albian) of Texas. *Journal of Vertebrate Paleontology* **16**, 232-245.
- Li, G. Q., Grande, L. & Wilson, M. V. H. (1997) The species of *Phareodus* (Teleostei: Osteoglossidae) from the Eocene of North America and their phylogenetic relationships. *Journal of Vertebrate Paleontology* **17**, 487-505.
- Li, G. Q. & Wilson, M. V. H. (1996) The discovery of Heterodontinae (Teleostei: Osteoglossidae) from the Paleocene Paskapoo Formation of Alberta, Canada. *Journal of Vertebrate Paleontology* **16**, 198-209.
- Livezey, B. C. & Martin, L. D. (1988) The systematic position of the Miocene anatid *Anas*[?] *blanchardi* Milne-Edwards. *Journal of Vertebrate Paleontology* **8**, 196-211.
- Lombard, R. E. & Bolt, J. R. (1995) A new primitive tetrapod, *Whatcheeria deltae*, from the Lower Carboniferous of Iowa. *Palaeontology* **38**, 471-494.
- Long, J. A. (1984) New phyllolepid from Victoria and the relationships of the group. *Proceedings of the Linnean Society of New South Wales* **107**, 263-308.
- Long, J. A. (1985) The structure and relationships of a new osteolepiform fish from the Late Devonian of Victoria, Australia. *Alcheringa* **9**, 1-22.
- Long, J. A. (1986) New ischnacanthid acanthodians from the Early Devonian of Australia, with comments on acanthodian interrelationships. *Zoological Journal of the Linnean Society* **87**, 321-339.
- Long, J. A. (1993) Cranial ribs in Devonian lungfishes and the origin of dipnoan air-breathing. *Memoirs of the Association of Australasian Palaeontologists* **15**, 199-209.
- Lucas, S. G. & Luo, Z. (1993) *Adelobasileus* from the Upper Triassic of West Texas: the oldest mammal. *Journal of Vertebrate Paleontology* **13**, 309-334.
- Lucas, S. G. & Sobus, J. (1989). The systematics of indricotheres In *The Evolution of Perissodactyls* (eds. D. R. Prothero & R. M. Schoch), pp. 358-378. New York: Clarendon Press.
- Lucas, S. G. & Tong, Y. (1987) A new coryphodontid (Mammalia, Pantodonta) from the Eocene of China. *Journal of Vertebrate Paleontology*. **7**, 362-372.
- Lucchini, V., Högglund, J., Klaus, S., Swenson, J. & Randi, E. (2001) Historical biogeography and a mitochondrial DNA phylogeny of grouse and ptarmigan. *Molecular Phylogenetics and Evolution* **20**, 149-162.
- Lund, R. (1989) New petalodonts (Chondrichthyes) from the Upper Mississippian Bear Gulch Limestone (Namurian E2b) of Montana. *Journal of Vertebrate Paleontology* **9**, 350-368.
- Lund, R. & Lund, W. L. (1985) Coelacanth from the Bear Gulch Limestone (Namurian) of Montana and the evolution of the Coelacanthiformes. *Bulletin of the Carnegie Museum of Natural History* **25**, 4-74.
- Lundberg, J. G., Linares, O. J., Antonio, M. E. & Nass, P. (1988) *Phractocephalus hemiliopterus* (Pimeolodidae, Siluriformes) from the Upper Miocene Urumaco Formation, Venezuela: a further case of evolutionary stasis and local extinction among South American fishes. *Journal of Vertebrate Paleontology* **8**, 131-138.
- Luo, Z. (1991) Variability of dental morphology and the relationships of the earliest arctocyonid species. *Journal of Vertebrate Paleontology* **11**, 452-471.
- Luo, Z. & Crompton, A. W. (1994) Transformation of the quadrate (incus) through the transition from non-mammalian cynodonts to mammals. *Journal of Vertebrate*

- Paleontology* **14**, 341-374.
- Luo, Z. & Marsh, K. (1996) Petrosal (periotic) and inner ear of a Pliocene kogiine whale (Kogiinae, Odontoceti): implications on relationships and hearing evolution of toothed whales. *Journal of Vertebrate Paleontology* **16**, 328-348.
- Lyal, C. H. C. (1985) Phylogeny and classification of the Psocodea, with particular reference to the lice (Psocodea: Phthiraptera). *Systematic Entomology* **10**, 145-165.
- MacFadden, B. J. (1997) Pleistocene horses from Tarija, Bolivia, and validity of the genus *Onohippidium* (Mammalia: Equidae). *Journal of Vertebrate Paleontology* **17**, 199-218.
- MacFadden, B. J. & Azzaroli, A. (1987) Cranium of *Equus insulatus* (Mammalia, Equidae) from the Middle Pleistocene of Tarija, Bolivia. *Journal of Vertebrate Paleontology* **7**, 325-334.
- Mader, B. J. (1989). The Brontotheriidae: a systematic revision and preliminary phylogeny of North American genera In *The Evolution of Perissodactyls* (eds. D. R. Prothero & R. M. Schoch), pp. 458-484. New York: Clarendon Press.
- Mahidol, C., Na-Nakorn, U., Sukmanomon, S., Yoosuk, W., Taniguchi, N. & Nguyen, T. T. T. (2007) Phylogenetic relationships among nine scallop species (Bivalvia: Pectinidae) inferred from nucleotide sequences of one mitochondrial and three nuclear gene regions. *Journal of Shellfish Research* **26**, 25-32.
- Mahner, M. (1993) Systema cryptoceratorum phylogenticum (Insecta, Heteroptera). *Zoologica* **143**, 1-302.
- Maisey, J. G. (1984) Chondrichthyan phylogeny: a look at the evidence. *Journal of Vertebrate Paleontology* **4**, 359-371.
- Maisey, J. G. (1984) Higher elasmobranch phylogeny and biostratigraphy. *Zoological Journal of the Linnean Society* **82**, 33-54.
- Maisey, J. G. (1986) Heads and tails: a chordate phylogeny. *Cladistics* **2**, 201-256.
- Mallatt, J. (1984) Early vertebrate evolution: pharyngeal structure and the origin of gnathostomes. *Journal of Zoology* **204**, 169-183.
- Manda, Š. & Turek, V. (2009) Revision of the Pragian Rutoceratoidea Hyatt, 1884 (Nautiloidea, Oncocerida) from the Prague Basin. *Bulletin of Geosciences* **84**, 127-148.
- Martin, A. P. & Palumbi, S. R. (1993) Protein evolution in different cellular environments: cytochrome b in sharks and mammals. *Molecular Biology and Evolution* **10**, 873-891.
- Martin, J. A. & Pashley, D. P. (1992) Molecular systematic analysis of butterfly family and some subfamily relationships (Lepidoptera: Papilionidae). *Annals of the Entomological Society of America* **85**, 127-139.
- Martin, J. W. & Cash-Clark, C. E. (1995) The external morphology of the onychoped cladoceran genus *Bythotrephes* (Crustacea, Branchiopoda, Onychopoda, Cercopagididae), with notes on the morphology and phylogeny of the Order Onychopoda. *Zoologica Scripta* **24**, 61-90.
- Martin, R. A. (1987) Notes on the classification and evolution of some North American fossil *Microtus* (Mammalia; Rodentia). *Journal of Vertebrate Paleontology* **7**, 270-283.
- Martinez, R. N., May, C. L. & Forster, C. A. (1996) A new carnivorous cynodont from the Ischigualasto Formation (Late Triassic, Argentina), with comments on eucynodont phylogeny. *Journal of Vertebrate Paleontology* **16**, 271-284.
- Maruyama, T., Ishikura, M., Yamazaki, S. & Kanai, S. (1998) Molecular phylogeny of zooxanthellate bivalves. *The Biological bulletin* **195**, 70-77.
- Maryanska, T. (1990). Pachycephalosauria In *The Dinosauria* (eds. D. B. Weishampel, P. Dodson & H. Osmólska), pp. 564-577. Berkeley: University of California Press.
- Matsumura, T., Hasegawa, M. & Shigei, M. (1979) Collagen biochemistry and phylogeny of

- echinoderms. *Comparative Biochemistry and Physiology* **62B**, 101-105.
- Mayr, G. (2002) Osteological evidence for paraphyly of the avian order Caprimulgiformes (nightjars and allies). *Journal of Ornithology* **143**, 82-97.
- Mayr, G. (2003) On the phylogenetic relationships of trogons (Aves, Trogonidae). *Journal of Avian Biology* **34**, 81-88.
- Mayr, G. (2003) Phylogeny of Early Tertiary swifts and hummingbirds (Aves: Apodiformes). *The Auk* **120**, 145-151.
- Mayr, G. (2003) The phylogenetic affinities of the Shoebill (*Balaeniceps rex*). *Journal of Ornithology* **144**, 157-175.
- Mayr, G. & Clarke, J. (2003) The deep divergences of neornithine birds: a phylogenetic analysis of morphological characters. *Cladistics* **19**, 527-553.
- Mayr, G., Manegold, A. & Johansson, U. S. (2003) Monophyletic groups within 'higher land birds' – comparison of morphological and molecular data. *Journal of Zoological Systematics and Evolutionary Research* **41**, 233-248.
- Mayr, G. (2004) Morphological evidence for sister group relationship between flamingos (Aves: Phoenicopteridae) and grebes (Podicipedidae). *Zoological Journal of the Linnean Society* **140**, 157-169.
- Mayr, G. & Weidig, I. (2004) The Early Eocene bird *Gallinuloides wyomingensis* – a stem group representative of Galliformes. *Acta Palaeontologica Polonica* **49**, 211-217.
- Mayr, G. (2005) Tertiary plotopterids (Aves, Plotopteridae) and a novel hypothesis on the phylogenetic relationships of penguins (Spheniscidae). *Journal of Zoological Systematics and Evolutionary Research* **43**, 61-71.
- Mayr, G. (2005) The postcranial osteology and phylogenetic position of the Middle Eocene *Messelastur gratulator* Peters, 1994 – a morphological link between owls (Strigiformes) and Falconiform birds? *Journal of Vertebrate Paleontology* **5**, 635-645.
- Mayr, G. (2005) The Paleogene fossil record of birds in Europe. *Biological Reviews* **80**, 515-542.
- Mayr, G. (2006) New specimens of the Eocene Messelirrisoridae (Aves: Bucerotes), with comments on the preservation of uropygial gland waxes in fossil birds from Messel and the phylogenetic affinities of Bucerotes. *Paläontologische Zeitschrift* **80**, 390-405.
- Mayr, G. (2008) Avian higher-phylogeny: well-supported clades what we can learn from a phylogenetic analysis of 2954 morphological characters. *Journal of Zoological Systematics and Evolutionary Research* **46**, 63-72.
- Mayr, G. (2010) Phylogenetic relationships of the paraphyletic "caprimulgiform" birds (nightjars and allies). *Journal of Zoological Systematics and Evolutionary Research* **48**, 126-137.
- McAllister, J. A. (1987) Phylogenetic distribution and morphological reassessment of the intestines of fossil and modern fishes. *Zoologische Jahrbuch für Anatomie* **115**, 281-294.
- McAlpine, J. F. (1989). Phylogeny and classification of the Muscomorpha In *Manual of Nearctic Diptera* (eds. J. F. McAlpine & D. M. Wood), pp. 1397-1518: Research Branch, Agriculture Canada.
- McCafferty, W. P. (1991) Towards a phylogenetic classification of the Ephemoptera (Insecta): a commentary on systematics. *Annals of the Entomological Society of America* **84**, 343-360.
- McIntosh, J. S. (1990). Sauropoda In *The Dinosauria* (eds. D. B. Weishampel, P. Dodson & H. Osmólska), pp. 345-401. Berkeley: University of California Press.
- Melchin, M. J. (1998) Morphology and phylogeny of some Early Silurian 'diplograptid' genera from Cornwallis Island, Arctic Canada. *Palaeontology* **41**, 263-315.

- Merle, D. & Pacaud, J-M. (2004) New species of *Eocithara* Fischer, 1883 (Mollusca, Gastropoda, Harpidae) from the Early Paleogene with phylogenetic analysis of the Harpidae. *Geodiversitas* **26**, 61-87.
- Messier, W. & Stewart, C. B. (1997) Episodic adaptive evolution of primate lysozymes. *Nature* **385**, 151-154.
- Meylan, P. A. (1996) Skeletal morphology and relationships of the Early Cretaceous side-necked turtle, *Araripemys barretoii* (Testudines: Pelomedusoides: Araripemydidae), from the Sanatana Formation of Brazil. *Journal of Vertebrate Paleontology* **16**, 20-33.
- Miles, R. S. (1977) Dipnoan (lungfish) skulls and the relationships of the group: a study based on new species from the Devonian of Australia. *Zoological Journal of the Linnean Society* **61**, 1-328.
- Miles, R. S. & Dennis, K. (1979) A primitive eubranchyothoracid arthrodire from Gogo, Western Australia. *Zoological Journal of the Linnean Society* **66**, 31-62.
- Miles, R. S. & Young, G. C. (1977). Placoderm interrelationships reconsidered in the light of new ptyctodontids from Gogo, Western Australia In *Problems in Vertebrate Evolution* (eds. S. M. Andrews, R. S. Miles & A. D. Walker), pp. 123-198. London: Academic Press.
- Milinkovitch, M. C., Orti, G. & Meyer, A. (1993) Revised phylogeny of whales suggested by mitochondrial ribosomal DNA sequences. *Nature* **361**, 346-348.
- Miller, D. R. & Miller, G. L. (1993) Description of a new genus of scale insect with a discussion of relationships among families related to the Kermesidae (Homoptera: Coccoidea). *Systematic Entomology* **18**, 237-251.
- Milner, A. R. (1988). The relationships and origin of living amphibians In *The Phylogeny and Classification of the Tetrapods* (ed. M. J. Benton. Oxford: Clarendon Press.
- Milsom, C., Simms, M. J. & Gale, A. S. (1994) Phylogeny and palaeobiology of Marsupites and Uintacrinus. *Palaeontology* **38**, 595-607.
- Miyamoto, M. M. & Boyle, S. M. (1989). The potential importance of mitochondrial DNA sequence data to eutherian mammal phylogeny. In *The Hierarchy of Life* (eds. B. Frenholm, K. Bremer & H. Jornvall), pp. 437-450. Amsterdam: Elsevier.
- Miyamoto, M. M. & Goodman, M. (1986) Biomolecular systematics of eutherian mammals: phylogenetic patterns and classification. *Systematic Zoology* **35**, 230-240.
- Miyamoto, M. M., Kraus, F., Laipis, P. J., Yanhauser, S. M. & Webb, S. D. (1993). Mitochondrial DNA phylogenies within Artiodactyla In *Mammal phylogeny* (eds. F. S. Szalay, M. J. Novacek & M. C. McKenna), pp. 268-281. New York: Springer Verlag.
- Miyamoto, M. M., Tanhauser, S. M. & Laipis, P. J. (1989) Systematic relationships in the artiodactyl tribe Bovini (family Bovidae), as determined from mitochondrial DNA sequences. *Systematic Zoology* **38**, 342-349.
- Modesto, S. P. (1994) The Lower Permian synapsid *Glaucosaurus* from Texas. *Palaeontology* **37**, 51-60.
- Modesto, S. P. (1995) The skull of the herbivorous synapsid *Edaphosaurus boanerges* from the Lower Permian of Texas. *Palaeontology* **38**, 213-239.
- Molnar, R. E., Kurzanov, S. M. & Dong, Z. (1990). Carnosauria In *The Dinosauria* (eds. D. B. Weishampel, P. Dodson & H. Osmólska), pp. 169-209. Berkeley: University of California Press.
- Monge-Najera, J. (1995) Cambrian lobopodians - ancestors of extant onychophorans? *Zoological Journal of the Linnean Society* **114**, 21-60.
- Moody, R. T. J. (1984). The relative importance of cranial/postcranial characters in the classification of sea turtles In *Studia Palaeoichthyologica I* (eds. F. de Broin & E. Jiménez-Fuentes), pp. 205-213. Salamanca: Universidad de Salamanca.

- Mooi, R. (1990) Paedomorphosis, Aristotle's lantern, and the origin of the sand dollars (Echinodermata: Clypeasteroidea). *Paleobiology* **16**, 25-48.
- Morales, J. C. & Melnick, D. J. (1994) Molecular systematics of the living rhinoceros. *Molecular Phylogenetics and Evolution* **3**, 128-134.
- Mou, Y. (1997) A new arvicoline species (Rodentia: Cricetidae) from the Pliocene Panaca Formation, southeast Nevada. *Journal of Vertebrate Paleontology* **17**, 376-383.
- Moura, G. & Christoffersen, M. L. (1996) The system of the mandibulate arthropods: Tracheata and Remipedia as sister groups, "Crustacea" non-monophyletic. *Journal of Comparative Biology* **1**, 95-113.
- Moyne, S. & Neige, P. (2004) Cladistic analysis of the Middle Jurassic ammonite radiation. *Geological Magazine* **141**, 115-123.
- Muirhead, J. & Wroe, S. (1998) A new genus and species, *Badjcinus turnbulli* (Thylacinidae: Marsupialia), from the Late Oligocene of Riversleigh, Northern Australia, and an investigation of thylacinid phylogeny. *Journal of Vertebrate Paleontology* **18**, 612-626.
- Nagatomi, A., Saigusa, T., Nagatomi, H. & Lyneborg, L. (1991) The systematic position of the Apsilocephalidae, Rhagionemphididae, Protemphididae, Hilarimorphidae, Vermileonidae and some genera of Bombyliidae (Insecta, Diptera). *Biological Science* **8**, 593-607.
- Nedbal, M. A., Allard, M. W. & Honeycutt, R. L. (1994) Molecular systematics of hystricognath rodents: evidence from the mitochondrial 12S rRNA gene. *Molecular Phylogenetics and Evolution* **3**, 206-220.
- Neige, P., Brayard, A., Gerber, S. & Rouget, I. (2009) Les Ammonoïdes (Mollusca, Cephalopoda): avancées et contributions récentes à la paléobiologie évolutive. *Comptes Rendus Palevol* **8**, 167-178.
- Nelson, C. (1984) Numerical cladistic analysis of phylogenetic relationships in Plecoptera. *Annals of the Entomological Society of America* **77**, 466-473.
- Nelson, G. J. (1969) Gill arches and the phylogeny of fishes, with notes on the classification of the vertebrates. *Bulletin of the American Museum of Natural History* **141**, 475-552.
- Nielsen, E. S. (1989) Phylogeny of major lepidopteran groups. *The Hierarchy of Life*, 281-294.
- Norman, D. B. (1984). A systematic reappraisal of the reptile order Ornithischia In *Third symposium on Mesozoic terrestrial ecosystems, short papers* (eds. W. E. Reif & F. Westphal), pp. 157-162. Tübingen: Attempto.
- Norman, D. B. & Weishampel, D. B. (1990). Iguanodontidae and related Ornithopoda In *The Dinosauria* (eds. D. B. Weishampel, P. Dodson & H. Osmólska), pp. 510-533. Berkeley: University of California Press.
- Novacek, M. J. (1989). Higher mammal phylogeny In *The hierarchy of life* (eds. B. Fernholm, K. Bremer & H. Jornvall), pp. 421-435. Amsterdam: Elsevier.
- Novacek, M. J., Wyss, A. R. & McKenna, M. C. (1988). The major groups of eutherian mammals In *The Phylogeny and Classification of the Tetrapods* (ed. M. J. Benton), pp. 31-71. Oxford: Clarendon Press.
- Novas, F. E. (1992) Phylogenetic relationships of the basal dinosaurs, the Herrerasauridae. *Palaeontology* **35**, 51-62.
- Novas, F. E. (1996) Dinosaur monophyly. *Journal of Vertebrate Paleontology* **16**, 723-741.
- Novas, F. E. (1997) Anatomy of *Patagonykus puertai* (Theropoda, Avialae, Alvarezsauridae) from the Late Cretaceous of Patagonia. *Journal of Vertebrate Paleontology* **17**, 137-166.
- Nylund, A., Okland, S. & Tjonneland, A. (1987) The crustacean heart ultrastructure and its bearing upon the position of the isopods in eumalacostracan phylogeny. *Zoologica*

- Scripta* **16**, 235-241.
- O'Brien, S. J., Nash, W. G., Wildt, D. E., Bush, M. E. & Benveniste, R. E. (1985) A molecular solution to the riddle of the giant panda's phylogeny. *Nature* **317**, 140-144.
- Olsen, P. E. (1984) The skull and pectoral girdle of the parasemionotid fish *Watsonulus eugnathoides* from the Early Triassic Sakamena Group of Madagascar, with comments on the relationships of the holostean fishes. *Journal of Vertebrate Paleontology* **4**, 481-499.
- Olsen, P. E. & McCune, A. R. (1991) Morphology of the *Semionotus elegans* species group from the Early Jurassic part of the Newark Supergroup of eastern North America with comments on the early Semionotidae (Neopterygii). *Journal of Vertebrate Paleontology* **11**, 269-292.
- Olsen, P. E. & McCune, A. R. (1991) Morphology of the *Semionotus elegans* species group from the Early Jurassic part of the Newark Supergroup of Eastern North America with comments on the Family Semionotidae (Neopterygii). *Journal of Vertebrate Paleontology* **11**, 269-292.
- Oswald, J. D. (1995) Revision of the African silky lacewing genus *Zygophlebius* Navas (Neuroptera, Psychopsidae). *African Entomology* **2**, 83-96.
- Otto, S. P., Cummings, M. P. & Wakeley, J. (1996). Inferring phylogenies from sequence data: the effects of sampling In *New uses for new phylogenies* (eds. P. H. Harvey, A. J. Leigh Brown, J. Maynard Smith & S. Nee), pp. 103-115. Oxford: Oxford University Press.
- Padian, K. & Chiappe, L. M. (1998) The origin and early evolution of birds. *Biological Reviews* **73**, 1-42.
- Panchen, A. L. & Smithson, T. R. (1988). The relationships of the earliest tetrapods In *The Phylogeny and Classification of the Tetrapods* (ed. M. J. Benton), pp. 1-32. Oxford: Clarendon Press.
- Pandolfi, J. M. (1989) Phylogenetic analysis of the early tabulate corals. *Palaeontology*. **32**, 745-764.
- Parenti, L. R. (1981) A phylogenetic and biogeographic analysis of cyprinodontiform fishes (Teleostei, Atherinomorpha). *Bulletin of the American Museum of Natural History* **168**, 335-557.
- Parrish, J. M. (1992) Phylogeny of the Erythrosuchidae (Reptilia: Archosauriformes). *Journal of Vertebrate Paleontology* **12**, 93-102.
- Parrish, J. M. (1993) Phylogeny of the Crocodylotarsi, with reference to archosaurian and crurotarsan monophyly. *Journal of Vertebrate Paleontology* **13**, 287-308.
- Parrish, J. M. (1994) Cranial osteology of *Longosuchus meadei* and the phylogeny and distribution of the Aetosauria. *Journal of Vertebrate Paleontology* **14**, 196-209.
- Passamaneck, Y. J., Schander, C. & Halanych, K. M. (2004) Investigation of molluscan phylogeny using large-subunit and small-subunit nuclear rRNA sequences. *Molecular Phylogenetics and Evolution* **32**, 25-38.
- Paton, T., Haddrath, O. & Baker, A. J. (2002) Complete mitochondrial DNA genome sequences show that modern birds are not descended from transitional shorebirds. *Proceedings of the Royal Society, Series B* **269**, 839-846.
- Patterson, C. (1976). The contribution of paleontology to teleostean phylogeny In *Major Patterns in Vertebrate Evolution* (eds. M. K. Hecht, P. C. Goody & B. M. Hecht), pp. 579-643. New York: Plenum Press.
- Patterson, C. (1982) Morphology and interrelationships of primitive actinopterygian fishes. *American Zoologist* **22**, 241-259.
- Patterson, C. & Rosen, D. E. (1977) Review of ichthyodectiform and other Mesozoic teleost fishes and the theory and practice of classifying fossils. *Bulletin of the American*

- Museum of Natural History* **158**, 81-172.
- Paul, C. R. C. (1988). The phylogeny of the cystoids In *Echinoderm Phylogeny and Evolutionary Biology* (eds. C. R. C. Paul & A. B. Smith), pp. 199-213. Oxford: Clarendon Press.
- Paul, C. R. C. & Smith, A. B. (1984) The early radiation and phylogeny of the echinoderms. *Biological Reviews* **59**, 443-481.
- Paul, G. S. (1984) The segnosaurian dinosaurs: relics of the prosauropod-ornithischian transition? *Journal of Vertebrate Paleontology* **4**, 507-515.
- Paulus, H. F. (1979). Eye structure and the monophyly of the Arthropoda In *Arthropod Phylogeny* (ed. A. P. Gupta), pp. 299-383. New York: Van Nostrand Reinhold Company.
- Pawloski, J., Szadziewski, R., Kmiecik, D., Fahrni, J. & Bittar, G. (1996) Phylogeny of the infraorder Culicimorpha (Diptera: Nematocera) based on 28S RNA gene sequences. *Systematic Entomology* **21**, 167-178.
- Penny, D., Hendy, M. D. & Steel, M. A. (1991). Testing the theory of descent. In *Phylogenetic Analysis of DNA Sequences* (eds. M. M. Miyamoto & J. Cracraft), pp. 155-183. Oxford: Oxford University Press.
- Pesole, G., Sbisa, E., Mignotte, F. & Saccone, C. (1991) The branching order of mammals: phylogenetic trees inferred from nuclear and mitochondrial molecular data. *Journal of Molecular Evolution* **33**, 537-542.
- Peterson, K. J. (1995) A phylogenetic test of the calcichordate scenario. *Lethaia* **28**, 25-38.
- Pettigrew, J. D. (1991) Wings or brain? Convergent evolution in the origins of bats. *Systematic Zoology* **40**, 199-216.
- Pettigrew, J. D., Jamieson, B. G. M., Robson, S. K., Hall, L. S., McAnally, K. I. & Cooper, H. M. (1989) Phylogenetic relations between microbats, megabats, and primates (Mammalia: Chiroptera and Primates). *Philosophical Transactions of the Royal Society of London, Series B* **325**, 489-559.
- Philippe, H. (1997) Rodent monophyly: pitfalls of molecular phylogenies. *Journal of Molecular Evolution* **45**, 712-715.
- Pires, A. M. (1987) Potiicoara brasiliensis: a new genus and species of Spelaeogriphacea (Crustacea: Peracarida) from Brazil with a phylogenetic analysis of the Peracarida. *Journal of Natural History* **21**, 225-238.
- Poe, S. & Chubb, A. L. (2004) Birds in a bush: five genes indicate explosive evolution of avian orders. *Evolution* **58**, 404-415.
- Pollock, D. A. (1994) Systematic position of pilipalpinæ (Coleoptera, Tenebrionoidea) and composition of Pyrochroidae. *The Canadian Entomologist* **126**, 515-532.
- Polly, P. D. (1990) The skeleton of Gazinocyon vulpeculus gen. et comb. nov. and the cladistic relationships of Hyaenodontidae (Eutheria, Mammalia). *Journal of Vertebrate Paleontology* **16**, 303-319.
- Ponder, W. F. & Lindberg, D. R. (1997) Towards a phylogeny of gastropod molluscs: an analysis using morphological characters. *Zoological Journal of the Linnean Society* **119**, 83-265.
- Popham, E. J. (1965) The functional morphology of the reproductive organs of the common (Forficula auricularia) earwig and other Dermaptera, with reference to the natural classification of the order. *Journal of Zoology* **146**, 1-43.
- Prado, J. L. & Alberdi, M. T. (1996) A cladistic analysis of the horses of the Tribe Equini. *Palaeontology*. **39**, 663-680.
- Prado, J. L., Cerdeño, E. & Roig-Juñent, S. (1998) The giant rodent Chapalmatherium from the Pliocene of Argentina: new remains and taxonomic remarks on the family Hydrochoeridae. *Journal of Vertebrate Paleontology* **18**, 788-798.

- Pratt, A. E. & Morgan, G. S. (1996) New Sciuridae (Mammalia: Rodentia) from the Early Miocene Thomas Farm local fauna, Florida. *Journal of Vertebrate Paleontology* **16**, 89-100.
- Presch, W. (1988). Cladistic relationships within the Scincomorpha In *Phylogenetic Relationships of the Lizard Families. Essays Commemorating Charles L. Camp* (eds. R. Estes & G. Pregill), pp. 471-492. Stanford: Stanford University Press.
- Prothero, D. R. (1993). Ungulate phylogeny: molecular vs. morphological evidence. In *Mammal Phylogeny: Placentals* (eds. F. S. Szalay, M. J. Novacek & M. C. McKenna), pp. 173-181. New York: Springer Verlag.
- Prothero, D. R., Manning, E. M. & Fischer, M. (1988). The phylogeny of the ungulates In *The Phylogeny and Classification of the Tetrapods* (ed. M. J. Benton), pp. 201-234. Oxford: Clarendon Press.
- Prothero, D. R. & Schoch, R. M. (1989). Classification of the Perissodactyla: summary and synthesis In *The Evolution of Perissodactyls* (eds. D. R. Prothero & R. M. Schoch), pp. 530-537. New York: Clarendon Press.
- Prychitko, T. M. & Moore, W. S. (2003) Alignment and phylogenetic analysis of beta-fibrinogen intron 7 sequences among avian orders reveal conserved regions within the intron. *Molecular Biology and Evolution* **20**, 762-771.
- Puillandre, N., Cruaud, C. & Kantor, Y. I. (2010) Cryptic species in *Gemmuloborsonia* (Gastropoda: Conoidea). *Journal of Molluscan Studies* **76**, 11-23.
- Raff, R. A., Field, K. G., Ghiselin, M. T., Lane, D. J., Olsen, G. J., Pace, N. R., Parks, A. L., Parr, B. A. & Raff, E. C. (1988). Molecular analysis of distant phylogenetic relationships in echinoderms In *Echinoderm Phylogeny and Evolutionary Biology* (eds. C. R. C. Paul & A. B. Smith), pp. 29-41. Oxford: Clarendon Press.
- Rasnitsyn, A. P. (1998). Problem of the basal dichotomy of the winged insects In *Arthropod Relationships* (eds. R. A. Fortey & R. H. Thomas), pp. 237-248. London.: Chapman & Hall.
- Raven, R. J. (1985) The spider infraorder Mygalomorphae (Araneae): cladistics and systematics. *Bulletin of the American Museum of Natural History* **182**, 1-180.
- Regenfuß, H. (1975) Die Antennen-Putzeinrichtung der Adephaga (Coleoptera), parallele evolutive Vervollkommung einer komplexen Struktur. *Zeitschrift für Zoologische Systematik und Evolutionsforschung* **13**, 278-299.
- Reisz, R. R., Berman, D. S. & Scott, D. (1984) The anatomy and relationships of the Lower Permian reptile *Araeoscelis*. *Journal of Vertebrate Paleontology* **4**, 57-67.
- Reisz, R. R., Dilkes, D. W. & Berman, D. S. (1988) Anatomy and relationships of *Elliotsmithia longiceps* Broom, a small synapsid (Eupelycosauria: Varanopseidae) from the Late Permian of South Africa. *Journal of Vertebrate Paleontology* **18**, 602-611.
- Retief, J. D., Krajewski, C., Westerman, M., Winkfein, R. J. & Dixon, G. H. (1995) Molecular phylogeny and evolution of marsupial protamine P1 genes. *Proceedings of the Royal Society, Series B* **259**, 7-14.
- Reynolds, P. D. & Okusu, A. (1999) Phylogenetic relationships among families of the Scaphopoda (Mollusca). *Zoological Journal of the Linnean Society* **126**, 131-154.
- Reynoso, V. H. (1996) A Middle Jurassic Sphenodon-like sphenodontian (Diapsida: Lepidosauria) from Huizachal Canyon, Tamaulipas, Mexico. *Journal of Vertebrate Paleontology* **16**, 210-221.
- Reynoso, V. H. (1997) A "beaded" sphenodontian (Diapsida: Lepidosauria) from the Early Cretaceous of central Mexico. *Journal of Vertebrate Paleontology* **17**, 52-59.
- Reynoso, V. H. & Clark, J. M. (1998) A dwarf sphenodontian from the Jurassic La Boca Formation of Tamaulipas, Mexico. *Journal of Vertebrate Paleontology* **18**, 333-339.



- Rieger, C. (1976) Skelett und Muskulature des Kopfes und Prothorax von *Ochterus marginatus* Latreille. *Zoomorphologie* **83**, 109-191.
- Rieppel, O. (1988). The classification of the Squamata In *The Phylogeny and Classification of the Tetrapods* (ed. M. J. Benton), pp. 261-293. Oxford: Clarendon Press.
- Rieppel, O. (1992) A new species of the genus *Saurichthys* (Pisces: Actinopterygii) from the Middle Triassic of Monte San Giorgio (Switzerland), with comments on the phylogenetic interrelationships of the genus. *Palaeontographica, Abteilung A* **221**, 63-94.
- Rieppel, O. (1998) The systematic status of *Hanosaurus hupehensis* (Reptilia, Sauropterygia) from the Triassic of China. *Journal of Vertebrate Paleontology* **18**, 545-557.
- Rieppel, O. & Werneburg, R. (1994) A new species of the sauropterygian *Cymatosaurus* from the Lower Muschelkalk of Thuringia, Germany. *Palaeontology* **41**, 575-589.
- Romero-Herrera, A. E., Lehmann, H., Joysey, K. A. & Friday, A. E. (1973) Molecular evolution of myoglobin and the fossil record: a phylogenetic synthesis. *Nature* **246**, 389-395.
- Rosen, D. E. (1974) Phylogeny and zoogeography of salmoniform fishes and relationships of *Lepidogalaxias salamandroides*. *Bulletin of the American Museum of Natural History* **153**, 265-326.
- Rosen, D. E. (1982) Teleostean interrelationships, morphological function and evolutionary inference. *American Zoologist* **22**, 261-273.
- Rosen, D. E., Forey, P. L., Gardiner, B. G. & Patterson, C. (1981) Lungfishes, tetrapods, paleontology, and plesiomorphy. *Bulletin of the American Museum of Natural History* **167**, 163-264.
- Rowe, T. (1988) Definition, diagnosis, and origin of Mammalia. *Journal of Vertebrate Paleontology* **8**, 241-264.
- Rowe, T. & Gauthier, J. A. (1990). Ceratosauria In *The Dinosauria* (eds. D. B. Weishampel, P. Dodson & H. Osmólska), pp. 151-168. Berkeley: University of California Press.
- Rowell, A. J. (1981). The origin of the brachiopods In *Lophophorates, notes for a short course*, pp. 97-109. Tennessee: University of Tennessee.
- Rubidge, B. S. (1991) A new primitive dinocephalian mammal-like reptile from the Permian of southern Africa. *Palaeontology* **34**, 547-559.
- Rubidge, B. S. (1994) Australosyodon, the first primitive anteosaurid dinocephalian from the Upper Permian of Gondwana. *Palaeontology* **37**, 579-594.
- Rudra, P., Bardhan, S. & Shome, S. (2007) Phylogeny of the Late Jurassic-Early Cretaceous subgenus *Eselaevitrigonia* (Bivalvia) of Kutch, India, and paleobiogeographic constraints. *Journal of Paleontology* **81**, 1066-1079.
- Rudwick, M. J. S. (1970) *Living and Fossil Brachiopods*. Hutchinson, London.
- Ruta, M. (1997) A new mitrate from the Lower Ordovician of southern France. *Palaeontology* **40**, 363-383.
- Ruta, M. & Theron, J. N. (1997) Two Devonian mitrates from South Africa. *Palaeontology* **40**, 201-243.
- Sampson, S. D. (1995) Two new horned dinosaurs from the Upper Cretaceous Two Medicine Formation of Montana; with a phylogenetic analysis of the Centrosaurinae (Ornithischia: Ceratopsidae). *Journal of Vertebrate Paleontology* **15**, 743-760.
- Sanders, H. L. (1965) The Cephalocarida and crustacean phylogeny. *Systematic Zoology* **14**, 112-128.
- Sanz, J. L. & Buscalioni, A. D. (1992) A new bird from the Early Cretaceous of Las Hoyas, Spain, and the early radiation of birds. *Palaeontology* **35**, 829-845.
- Schaeffer, B. (1973). Interrelationships of chondrosteans In *Interrelationships of Fishes* (eds. P. H. Greenwood, R. S. Miles & C. Patterson), pp. 207-226. London: Academic

- Press.
- Schaeffer, B. (1981) The xenacanth shark neurocranium, with comments on elasmobranch monophyly. *Bulletin of the American Museum of Natural History* **169**, 1-66.
- Schaeffer, B. & Williams, M. (1977) Relationships of fossil and living elasmobranchs. *American Zoologist* **17**, 293-302.
- Schaeffer, S. A. & Lauder, G. V. (1986) Historical transformation of functional design: Evolutionary morphology of feeding mechanisms in loracarioid catfishes. *Systematic Zoology* **35**, 489-508.
- Schmidt Nielsen, E. & Davis, D. R. (1985) The first southern hemisphere prodoxid and the phylogeny of the Incurvarioidea (Lepidoptera). *Systematic Entomology* **10**, 307-322.
- Schneider, J. (2002) Phylogeny of cardiid bivalves (cockles and giant clams): revision of the Cardiinae and the importance of fossils in explaining disjunct biogeographical distributions. *Zoological Journal of the Linnean Society* **136**, 321-369.
- Schoch, R. M. (1989). A review of the tapiroids In *The Evolution of Perissodactyls* (eds. D. R. Prothero & R. M. Schoch), pp. 298-321. New York: Clarendon Press.
- Schram, F. R. (1981) On the classification of the Eumalacostraca. *Journal of Crustacean Biology* **1**, 1-10.
- Schram, F. R. (1986) *Crustacea*. Oxford: Oxford University Press.
- Schuh, R. T. & Stys, P. (1991) Phylogenetic analysis of cimicomorphan family relationships (Heteroptera). *Journal of the New York Entomological Society* **99**, 298-350.
- Schultze, H. P. (1987). Dipnoans as sarcopterygians In *The Biology and Evolution of Lungfishes* (eds. W. E. Bemis, W. W. Burggren & N. E. Kemp), pp. 39-74. New York: Alan R. Liss.
- Schultze, H. P. (1988) Notes on the structure and phylogeny of vertebrate otoliths. *Copeia* **1988**, 257-260.
- Schultze, H. P. (1990) A new acanthodian from the Pennsylvanian of Utah, U.S.A., and the distribution of otoliths in gnathostomes. *Journal of Vertebrate Paleontology* **10**, 49-58.
- Schultze, H. P. (1994) Comparison of hypotheses on the relationships of sarcopterygians. *Systematic Biology* **43**, 155-173.
- Schwenk, K. (1988) Comparative morphology of the lepidosaur tongue and its relevance to squamate phylogeny. *Phylogenetic Relationships of the Lizard Families. Essays Commemorating Charles L. Camp*, 569-598.
- Seilacher, A. (1979) Constructional morphology of sand dollars. *Paleobiology* **5**, 191-221.
- Selden, P. A. (1991) A spider and other arachnids from the Devonian of New York, and reinterpretations of Devonian Araneae. *Palaeontology* **34**, 241-281.
- Selden, P. A. (1992) Revision of fossil ricinuleids. *Transactions of the Royal Society of Edinburgh* **83**, 595-634.
- Selden, P. A. (1993) Fossil arachnids - recent advances and future prospects. *Memoirs of the Queensland Museum* **33**, 389-400.
- Sengupta, D. P. (1995) Chigutisaurid temnospondyls from the Late Triassic of India and a review of the Family Chigutisauridae. *Palaeontology* **38**, 313-339.
- Sequeira, S. E. K. & Milner, A. R. (1993) The temnospondyl amphibian Capetus from the Upper Carboniferous of the Czech Republic. *Palaeontology* **36**, 657-680.
- Sereno, P. C. (1984). The phylogeny of the Ornithischia: a reappraisal In *Third symposium on Mesozoic terrestrial ecosystems, short papers* (eds. W. E. Reif & F. Westphal), pp. 219-226. Tübingen: Attempto.
- Sereno, P. C. (1986) Phylogeny of the bird-hipped dinosaurs (Order Ornithischia). *National Geographic Research* **2**, 234-256.
- Sereno, P. C. (1991) Basal archosaurs: phylogenetic relationships and functional

- implications. *Society of Vertebrate Paleontology, Memoir* **2**, 1-52.
- Sereno, P. C., Arcucci, A. B., Shaffer, H. B., Meylan, P. & McKnight, M. L. (1993) Dinosaurian precursors from the Middle Triassic of Argentina: *Lagerpeton chanarensis*. *Journal of Vertebrate Paleontology* **13**, 385-399.
- Sereno, P. C. & Dong, Z. (1998) The skull of the basal stegosaur *Huayangosaurus taibaii* and a cladistic diagnosis of Stegosauria. *Journal of Vertebrate Paleontology* **18**, 318-343.
- Shaffer, H. B., Meylan, P., & McKnight, M. L. (1997). Tests of turtle phylogeny: molecular, morphological and paleontological approaches. *Systematic Biology* **46**, 235-268.
- Shockey, B. J. (1997) Two new notoungulates (Family Notohippidae) from the Salla Beds of Bolivia (Deseadean: Late Oligocene): systematics and functional morphology. *Journal of Vertebrate Paleontology* **17**, 584-599.
- Shoshani, J. (1986) Mammalian phylogeny: comparison of morphological and molecular results. *Molecular Biology and Evolution* **3**, 222-242.
- Shoshani, J. (1986) Mammal phylogeny: comparison of morphological and molecular results. *Molecular Biology and Evolution* **3**, 222-242.
- Sieg, V. (1988) The phylogenetic system of the Tanaidacea and the question of age and origin of the crustacean fauna on the antarctic shelf. *Zeitschrift für zoologische Systematik und Evolutionsforschung* **26**, 363-379.
- Sigwart, J. D. & Sutton, M. D. (2007) Deep molluscan phylogeny: synthesis of palaeontological and neontological data. *Proceedings of the Royal Society, Series B* **274**, 2413-2419.
- Simms, M. J. (1988). The phylogeny of post-Palaeozoic crinoids In *Echinoderm Phylogeny and Evolutionary Biology* (eds. C. R. C. Paul & A. B. Smith), pp. 269-284. Oxford: Clarendon Press.
- Simms, M. J. (1994) Reinterpretation of thecal plate homology and phylogeny in the Class Crinoidea. *Lethaia* **26**, 303-312.
- Simms, M. J. & Sevastopulo, G. D. (1993) The origin of articulate crinoids. *Palaeontology* **36**, 91-109.
- Sinclair, B. J. (1992) A phylogenetic interpretation of the Brachycera (Diptera) based on the larval mandible and associated mouthpart structures. *Systematic Entomology* **17**, 233-252.
- Smiley, S. (1988). The phylogenetic relationships of holothurians: a cladistic analysis of the extant echinoderm classes In *Echinoderm Phylogeny and Evolutionary Biology* (eds. C. R. C. Paul & A. B. Smith), pp. 69-84. Oxford: Clarendon Press.
- Smith, A. B. (1984) Classification of the Echinodermata. *Palaeontology* **2**, 431-459.
- Smith, A. B. (1984) *Echinoid Palaeobiology*. London: George Allen and Unwin.
- Smith, A. B. (1985) Cambrian eleutherozoan echinoderms and the early diversification of edrioasteroids. *Palaeontology* **28**, 715-756.
- Smith, A. B. (1988). Fossil evidence for the relationships of extant echinoderm classes and their times of divergence In *Echinoderm Phylogeny and Evolutionary Biology* (eds. C. R. C. Paul & A. B. Smith), pp. 85-97. Oxford: Clarendon Press.
- Smith, A. B. (1988) Patterns of diversification and extinction in early Paleozoic echinoderms. *Palaeontology* **31**, 799-828.
- Smith, R. M. H. & Evans, S. E. (1996) New material of Youngina: evidence of juvenile aggregation in Permian diapsid reptiles. *Palaeontology* **39**, 289-303.
- Soliar, T. (1988) The mosasaur *Goronyosaurus* from the Upper Cretaceous of Sokoto State, Nigeria. *Palaeontology* **31**, 747-762.
- Soto, F. N. (1994) *Annals of the Entomological Society of America*. **87**, 723-736.
- Spears, T., Abele, L. G. & Kim, W. (1992) The monophyly of brachyuran crabs - a phylogenetic study based on 18S-ribosomal-RNA. *Systematic Biology* **41**, 446-461.

- Spence, J. R. & Andersen, N. M. (1994) Biology of water striders - interactions between systematics and ecology. *Annual Review of Entomology* **39**, 101-128.
- Springer, M. S. & Kirsch, J. A. W. (1993) A molecular perspective on the phylogeny of placental mammals based on mitochondrial 12S rDNA sequences. *Journal of Mammalian Evolution* **1**, 149-166.
- Springer, M. S. & Woodburne, M. O. (1989) The distribution of some basicranial characters within the Marsupialia and a phylogeny of the Phalangeriformes. *Journal of Vertebrate Paleontology* **9**, 210-221.
- Stanhope, M. J., Czelusniak, J., Si, J. S., Nickerson, J. & Goodman, M. (1992) A molecular perspective on mammalian evolution from the gene encoding interphotoreceptor retinoid binding protein, with convincing evidence for bat monophyly. *Molecular Phylogenetics and Evolution* **1**, 148-160.
- Stanley, H. F., Kadwell, M. & Wheeler, J. C. (1994) Molecular evolution of the family Camelidae: a mitochondrial DNA study. *Proceedings of the Royal Society, Series B* **256**, 1-6.
- Steiner, G. (1992) Phylogeny and Classification of Scaphopoda. *Journal of Molluscan Studies* **58**, 385-400.
- Steiner, G. & Muller, M. (1996) What can 18S rDNA do for bivalve phylogeny? *Journal of Molecular Evolution* **43**, 58-70.
- Steppan, S. J. (1996) A new species of *Holochilus* (Rodentia: Sigmodontinae) from the Middle Pleistocene of Bolivia and its phylogenetic significance. *Journal of Vertebrate Paleontology* **16**, 522-530.
- Steppan, S. J. & Pardiñas, U. F. J. (1997) Two new fossil muroids (Sigmodontinae: Phyllotini) from the Early Pleistocene of Argentina: phylogeny and paleoecology. *Journal of Vertebrate Paleontology* **17**, 640-649.
- Stockwell, S. A. (1989) *Revision of the Phylogeny and Higher Classification of Scorpions (Chelicerata)*. Ph.D. Dissertation, University of California, Berkeley.
- Stuart, J. A., Ooi, E. L., McLeod, J., Bourns, A. E. & Ballantyne, J. S. (1998) D- and L- $\beta$ -Hydroxybutyrate dehydrogenases and the evolution of ketone body metabolism in Gastropod Molluscs. *Biological Bulletin* **195**, 12-16.
- Stys, P. & Bilinsky, S. (1990) Ovariole types and the phylogeny of hexapods. *Biological Reviews* **65**, 401-429.
- Stys, P., Zrzavy, J. & Weyda, F. (1993) Phylogeny of the Hexapoda and ovarian metamerism. *Biological Review* **68**, 365-379.
- Sues, H. D. (1997) On *Chirostenotes*, a Late Cretaceous oviraptorosaur (Dinosauria: Theropoda) from western North America. *Journal of Vertebrate Paleontology* **17**, 698-716.
- Sues, H. D., Shubin, N. H. & Olsen, P. E. (1994) A new sphenodontian (Lepidosauria: Rhynchocephalia) from the McCoy Brook Formation (Lower Jurassic) of Nova Scotia, Canada. *Journal of Vertebrate Paleontology* **14**, 327-340.
- Sullivan, R. M. (1998) The skull of *Glyptosaurus sylvestris* Marsh, 1871 (Lacertilia: Anguidae). *Journal of Vertebrate Paleontology* **6**, 28-37.
- Sumida, S. S., Berman, D. S. & Martens, T. (1998) A new trematopid amphibian from the Lower Permian of central Germany. *Palaeontology* **41**, 605-629.
- Szalay, F. S. & Trofimov, B. A. (1996) The Mongolian Late Cretaceous *Asiatherium*, and the early phylogeny and paleobiogeography of Metatheria. *Journal of Vertebrate Paleontology* **16**, 474-509.
- Tagle, D. A., Miyamoto, M. M., Goodman, M., Hofmann, O., Braunitzer, G. & Jalanka, H. (1986) Hemoglobin of pandas: phylogenetic relationships of carnivores as ascertained with protein sequence data. *Naturwissenschaften* **73**, 512-514.

- Tassy, P. & Shoshani, J. (1988). The Tethytheria: elephants and their relatives In *The Phylogeny and Classification of the Tetrapods* (ed. M. J. Benton), pp. 283-315. Oxford: Clarendon Press.
- Taylor, P. D. (1990) Bioimmured ctenostomes from the Jurassic and the origin of the chelostome Bryozoa. *Palaeontology* **33**, 19-34.
- Taylor, J. D., Williams, S. T., Glover, E. A. & Dyal, P. (2007) A molecular phylogeny of heterodont bivalves (Mollusca: Bivalvia: Heterodonta): new analyses of 18S and 28S rRNA genes *Zoologica Scripta* **36**, 587-606.
- Thewissen, J. G. M. & Domning, D. P. (1992) The role of phenacodontids in the origin of the modern orders of ungulate mammals. *Journal of Vertebrate Paleontology* **12**, 494-504.
- Thomas, A. T. & Holloway, D. J. (1988) Classification and phylogeny of the trilobite order Lichida. *Philosophical Transactions of the Royal Society of London, B* **321**, 179-262.
- Thorne, B. L. & Carpenter, J. M. (1992) Phylogeny of the Dictyoptera. *Systematic Entomology* **17**, 253-268.
- Trueb, L. & Cloutier, R. (1991). A phylogenetic investigation of the inter- and intrarelationships of the Lissamphibia (Amphibia: Temnospondyli) In *Origins of the Higher Groups of Tetrapods* (eds. H. P. Schultze & L. Trueb), pp. 223-313. Ithaca, N.Y.: Cornell University Press.
- Van Iken, H. (1992) Morphology and phylogenetic significance of the corners and midlines of the conulariid test. *Palaeontology* **35**, 335-358.
- Van Tuinen, M., Sibley, C. G. & Hedges, S. B. (1998) Phylogeny and biogeography of ratite birds inferred from DNA sequences of the mitochondrial ribosomal genes. *Molecular Biology and Evolution* **15**, 370-376.
- Van Tuinen, M., Stidham, T. A. & Hadly, E. A. (2006) Tempo and mode of modern bird evolution observed with large-scale taxonomic sampling. *Historical Biology* **18**, 205-221.
- Van Tuinen, M., Butvill, D. B., Kirsch, J. A. & Hedges, S. B. (2001) Convergence and divergence in the evolution of aquatic birds. *Proceedings of the Royal Society, Series B* **268**, 1345-1350.
- Van Valkenburgh, B., Grady, F. & Kurtén, B. (1990) The Plio-Pleistocene cheetah-like cat *Miracinonyx inexpectatus* of North America. *Journal of Vertebrate Paleontology* **10**, 434-454.
- Vannier, J. & Abe, K. (1992) Recent and early paleozoic myodocope ostracodes - functional-morphology, phylogeny, distribution and life-styles. *Palaeontology* **35**, 485-517.
- Varricchio, D. J. & Chiappe, L. M. (1995) A new enantiornithine bird from the Upper Cretaceous Two Medicine Formation of Montana. *Journal of Vertebrate Paleontology* **15**, 201-204.
- Vendrasco, M. J., Wood, T. E. & Runnegar, B. N. (2004) Articulated Palaeozoic fossil with 17 plates greatly expands disparity of early chitons. *Nature* **429**, 288-291.
- von Dohlen, C. D. & Moran, N. A. (1995) Molecular phylogeny of the Homoptera: a paraphyletic taxon. *Journal of Molecular Evolution* **41**, 211-223.
- Vermeij, G. J. & Carlson, S. J. (2000) The muricid gastropod subfamily Rapaninae: phylogeny and ecological history. *Paleobiology* **26**, 19-46.
- Vonnemann, V., Schrodll, M., Klusmann-Kolb, A. & Wagele, H. (2005) Reconstruction of the phylogeny of the Opisthobranchia (Mollusca: Gastropoda) by means of 18s and 28s rRNA gene sequences. *Journal of Molluscan Studies* **71**, 113-125.
- Vorobyeva, E. & Schultze, H. P. (1991). Description and systematics of panderichthyid fishes with comments on their relationship to tetrapods In *Origins of the Higher Groups of Tetrapods* (eds. H. P. Schultze & L. Trueb), pp. 68-109. Ithaca, N.Y.:

- Cornell University Press.
- Vrana, P. B., Milinkovitch, M. C., Powell, J. R. & Wheeler, W. C. (1994) Higher level relationships of the arctoid Carnivora based on sequence data and "total evidence". *Molecular Phylogenetics and Evolution* **3**, 47-58.
- Wada, S. (1991) Morphological indexes for immediate sister group relationship of Schizophora with Syrphoidea (Aschiza) in the phylogenetic systematics of Cyclorhapha (Brachycera, Diptera). *Journal of Natural History* **25**, 1531-1570.
- Wagele, H. & Klussmann-Kolb, A. (2005) Opisthobranchia (Mollusca, Gastropoda) – more than just slimy slugs. Shell reduction and its implications on defence and foraging. *Frontiers in Zoology* **2**, 1-18.
- Wall, W. P. (1989) The phylogenetic history and adaptive radiation of the Amynodontidae. *The Evolution of Perissodactyls*, 341-354.
- Waller, T. R. (2006) Phylogeny of families in the Pectinoidea (Mollusca: Bivalvia): importance of the fossil record. *Zoological Journal of the Linnean Society* **148**, 313–342.
- Walossek, D. (1993) in *Fossils and Strata*, Vol. 32.
- Wang, X. (1997) New cranial material of Simocon from China, and its implications for phylogenetic relationship to the red panda (Ailurus). *Journal of Vertebrate Paleontology* **17**, 184-198.
- Wang, Y., Clemens, W. A., Hu, Y. & Li, C. (1998) A probable pseudo-tribosphenic upper molar from the Late Jurassic of China and the early radiation of the Holotheria. *Journal of Vertebrate Paleontology* **18**, 777-787.
- Warren, A. A. & Black, T. (1985) A new rhytidosteid (Amphibia, Labyrinthodontia) from the Early Triassic Arcadia Formation of Queensland. *Journal of Vertebrate Paleontology* **5**, 303-327.
- Watling, L. (1983). Peracaridan disunity and its bearing on eumalacostracan phylogeny with a redefinition of eumalacostracan superorders In *Crustacean Issues* (ed. F. R. Schram), pp. 213-228. Rotterdam: Balkema.
- Wayne, R. K., Van Valkenburgh, B. & O'Brien, S. J. (1991) Molecular distance and divergence time in carnivores and primates. *Molecular Biology and Evolution* **8**, 297-319.
- Webb, S. D. (1981) *Kyptoceras amatorum*, new genus and species from the Pliocene of Florida, the last protoceratid artiodactyls. *Journal of Vertebrate Paleontology* **1**, 357-365.
- Weishampel, D. B., Norman, D. B. & Grigorescu, D. (1993) *Telmatosaurus transsylvanicus* from the Late Cretaceous of Romania: the most basal hadrosaurid dinosaur. *Palaeontology* **36**, 361-385.
- Weishampel, D. B. a. H. J. R. (1990). Hadrosauridae In *The Dinosauria* (eds. D. B. Weishampel, P. Dodson & H. Osmólska), pp. 534-561. Berkeley: University of California Press.
- Weller, S. J., Pashley, D. P., Martin, J. A. & Constable, J. L. (1994) Phylogeny of noctuid moths and the utility of combining independent nuclear and mitochondrial genes. *Systematic Biology* **43**, 194-211.
- Weygoldt, P. (1979). Significance of later embryonic stages and head development In *arthropod phylogeny* (ed. A. P. Gupta), pp. 107-135. New York: Van Nostrand Reinhold Company.
- Wible, J. R. (1990) Petrosals of Late Cretaceous marsupials from North America, and a cladistic analysis of the petrosal in therian mammals. *Journal of Vertebrate Paleontology* **10**, 183-205.
- Wible, J. R. (1991) Origin of Mammalia: the craniodental evidence reexamined. *Journal of*

- Vertebrate Paleontology* **11**, 1-28.
- Wiggins, G. B. & Wichard, W. (1989) Phylogeny of pupation in Trichoptera, with proposals on the origin and higher classification of the order. *Journal of the North American Benthological Society* **8**, 260-276.
- Wiley, E. O. (1979) Ventral gill arch muscles and the interrelationships of gnathostomes, with a new classification of the Vertebrata. *Zoological Journal of the Linnean Society* **67**, 149-179.
- Wiley, E. O. & Schultze, H. P. (1984). Family Lepisosteidae (gars) as living fossils In *Living Fossils* (eds. N. Eldredge & S. M. Stanley), pp. 160-165. New York: Springer Verlag.
- Williams, A., Carlson, S. J., Brunton, C. H. C., Holmer, L. E. & Popov, L. E. (1996) A supraordinal classification of the Brachiopoda. *Philosophical Transactions of the Royal Society, Series B* **351**, 1171-1193.
- Williams, A. & Hurst, J. M. (1977). Brachiopod evolution In *Patterns and Processes in Evolution* (ed. A. Hallam), pp. 79-121. Amsterdam: Elsevier.
- Williams, A., Popov, L. E., Holmer, L. E. & Cusack, M. (1998) The diversity and phylogeny of the paterinate brachiopods. *Palaeontology* **41**, 221-262.
- Williamson, T. E. (1996) ?*Brachychampsia sealeyi*, sp.nov.(Crocodylia, Alligatoroidea) from the Upper Cretaceous (Lower Campanian) Menefee Formation, northwestern New Mexico. *Journal of Vertebrate Paleontology* **16**, 421-431.
- Willman, R. (1987) The phylogenetic system of the Mecoptera. *Systematic Entomology* **12**, 519-524.
- Wills, M. A. (1998). A phylogeny of Recent and fossil Crustacea derived from morphological characters In *Arthropod Relationships* (eds. R. A. Fortey & R. H. Thomas), pp. 189-210. London: Chapman & Hall.
- Wills, M. A., Briggs, D. E. G. & Fortey, R. A. (1994) Disparity as an evolutionary index - a comparison of Cambrian and Recent arthropods. *Paleobiology* **20**, 93-130.
- Wills, M. A., Briggs, D. E. G., Fortey, R. A., Wilkinson, M. & Sneath, P. H. A. (1998). An arthropod phylogeny based on fossil and Recent taxa In *Arthropod Fossils and Phylogeny* (ed. G. E. Edgecombe), pp. 33-105. New York: Columbia University Press.
- Wilson, M. V. H. & Caldwell, M. W. (1998) The Furcacaudiformes: a new order of jawless vertebrates with thelodont scales, based on articulated Silurian and Devonian fossils from northern Canada. *Journal of Vertebrate Paleontology* **18**, 10-29.
- Wilson, M. V. H. & Williams, R. R. G. (1991) New Paleocene genus and species of smelt (Teleostei: Osmeridae) from freshwater deposits of the Paskapoo Formation, Alberta, Canada, and comments on osmerid phylogeny. *Journal of Vertebrate Paleontology* **11**, 434-451.
- Winkler, A. J. (1992) Systematics and biogeography of Middle Miocene rodents from the Muruyur Beds, Baringo District, Kenya. *Journal of Vertebrate Paleontology* **12**, 236-249.
- Winkler, D. A., Murry, P. A. & Jacobs, L. L. (1997) A new species of Tenontosaurus (Dinosauria: Ornithomimidae) from the Early Cretaceous of Texas. *Journal of Vertebrate Paleontology* **17**, 330-348.
- Winnepenninckx, B., Backeljau, T. & De Wachter, R. (1996) Investigation of molluscan phylogeny on the basis of 18S rRNA sequences. *Molecular Biology and Evolution* **13**, 1306-1317.
- Wood, D. M. & Borkent, A. (1989). Phylogeny and classification of the Nematocera In *Manual of Nearctic Diptera* (eds. J. F. McAlpine & D. M. Wood), pp. 1333-1370: Research Branch, Agriculture Canada.
- Woodley, N. E. (1989). Phylogeny and classification of the "Orthorrhaphous" Brachycera In

- Manual of Nearctic Diptera* (eds. J. F. McAlpine & D. M. Wood), pp. 1371-1395: Research Branch, Agriculture Canada.
- Woods, I. S. & Jefferies, R. P. S. (1992) A new stem-group chordate from the Lower Ordovician of South Wales, and the problem of locomotion in boot-shaped cornutes. *Palaeontology* **35**, 1-25.
- Worthy, T. H. (2009) Descriptions and phylogenetic relationships of two new genera and four new species of Oligo-Miocene waterfowl (Aves: Anatidae) from Australia. *Zoological Journal of the Linnean Society* **156**, 411-454.
- Wright, A. D. (1979). Brachiopod radiation In *The Origin of Major Invertebrate Groups* (ed. M. R. House), pp. 235-252. London: Academic Press.
- Wu, X. C. & Brinkman, D. B. (1993) A new crocodylomorph of 'mesosuchian' grade from the Upper Cretaceous upper Milk River Formation, southern Alberta. *Journal of Vertebrate Paleontology* **13**, 153-160.
- Wu, X. C., Brinkman, D. B. & Lu, J. C. (1994) A new species of Shantungosuchus from the Lower Cretaceous of Inner Mongolia (China), with comments on *S. chuhsiensis* Young, 1961 and the phylogenetic position of the genus. *Journal of Vertebrate Paleontology* **14**, 210-229.
- Wu, X. C., Brinkman, D. B. & Russell, A. P. (1996) A new alligator from the Upper Cretaceous of Canada and the relationships of early eusuchians. *Palaeontology* **39**, 351-375.
- Wu, X. C. & Chatterjee, S. (1993) *Dibothrosuchus elaphros*, a crocodylomorph from the Lower Jurassic of China and the phylogeny of the Sphenosuchia. *Journal of Vertebrate Paleontology* **13**, 58-89.
- Wu, X. C. & Sues, H. D. (1996) Anatomy and phylogenetic relationships of *Chimaerasuchus paradoxus*, an unusual a new crocodyliform reptile from the Lower Cretaceous of Hubei, China. *Journal of Vertebrate Paleontology* **16**, 688-702.
- Wu, X. C., Sues, H. D. & Dong, Z. M. (1997) *Sichuanosuchus shuhanensis*, a new ?Early Cretaceous protosuchian (Archosauria: Crocodyliformes) from Sichuan (China), and the monophyly of Protosuchia. *Journal of Vertebrate Paleontology* **17**, 89-103.
- Wyss, A. R., Novacek, M. J. & McKenna, M. C. (1987) Amino acid sequence versus morphological data and the interordinal relationships of mammals. *Molecular Biology and Evolution* **4**, 99-116.
- Yoon, S. H. & Kim, W. (2005) Phylogenetic relationships among six vetigastropod subgroups (Mollusca, Gastropoda) based on 18S rDNA sequences. *Molecules and Cells* **19**, 283-288.
- Young, G. C. (1979) New information on the structure and relationships of *Buchanosteus* (Placodermi: Euarthrodira) from the Early Devonian of New South Wales. *Zoological Journal of the Linnean Society* **66**, 309-352.
- Young, G. C. (1984) Comments on the phylogeny and biogeography of antiarchs (Devonian placoderm fishes), and the use of fossils in biogeography. *Proceedings of the Linnean Society of New South Wales* **107**, 443-473.
- Young, G. C. (1986) The relationships of placoderm fishes. *Zoological Journal of the Linnean Society* **88**, 1-57.
- Yu, X. (1998) A new porolepiform-like fish, *Psarolepis romeri*, gen. et sp. nov. (Sarcopterygii, Osteichthyes) from the Lower Devonian of Yunnan, China. *Journal of Vertebrate Paleontology* **18**, 261-274.
- Zaher, H. (1998) The phylogenetic position of *Pachyrhachis* within snakes (Squamata, Lepidosauria). *Journal of Vertebrate Paleontology* **18**, 1-3.
- Zehren, S. J. (1987) Osteology and evolutionary relationships of the boarfish genus *Antigonia* (Teleostei: Caproidae). *Copeia* **1987**, 564-592.



References for 1,094 cladograms in Supplementary Data Table 1

- Zessin, W. (1985) Neue oberliassische Apocrita und die Phylogenie der Hymenoptera. *Deutsche Entomologische Zeitschrift* **32**, 129-142.
- Zhou, X., Zhai, R., Gingerich, P. D. & Chen, L. (1995) Skull of a new mesonychid (Mammalia, Mesonychia) from the Late Pliocene of China. *Journal of Vertebrate Paleontology* **15**, 387-400.
- Zhou, Z. & Zhang, F. (2006) A beaked basal ornithurine bird (Aves, Ornithurae) from the Lower Cretaceous of China. *Zoologica Scripta* **35**, 363-373.
- Zhu, M. & Janvier, P. (1996) A small antiarch, *Minicrania lirouyi* gen.et sp.nov., from the Early Devonian of Qujing, Yunnan (China), with remarks on antiarch phylogeny. *Journal of Vertebrate Paleontology* **16**, 1-15.
