# Supplementary material
Source: publisher figshare collection journal article supplement (https://geolsoc.figshare.com/articles/dataset/_/3452936)

Warren & Black 1985 fig. 14 6 Perm-Tri 0.333

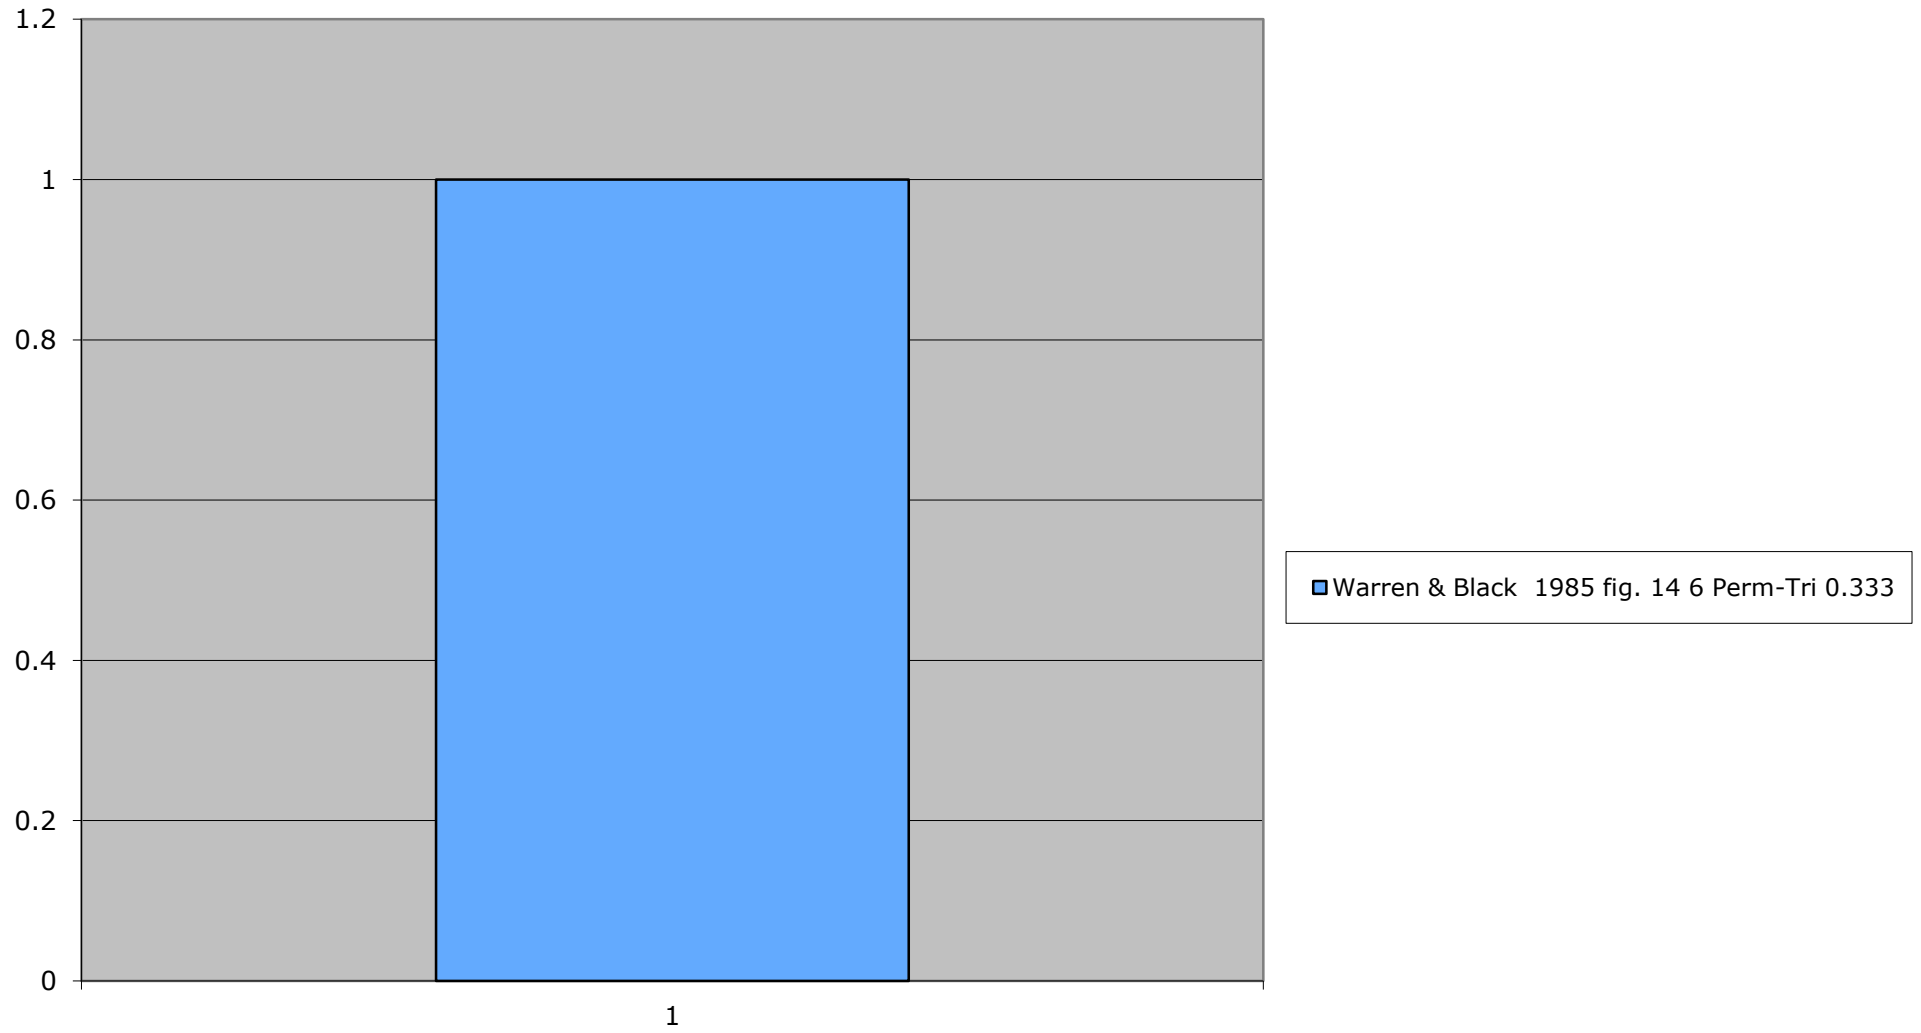

Supplement: Supplementary file 1 [file 1]

# Residuals vs Fitted

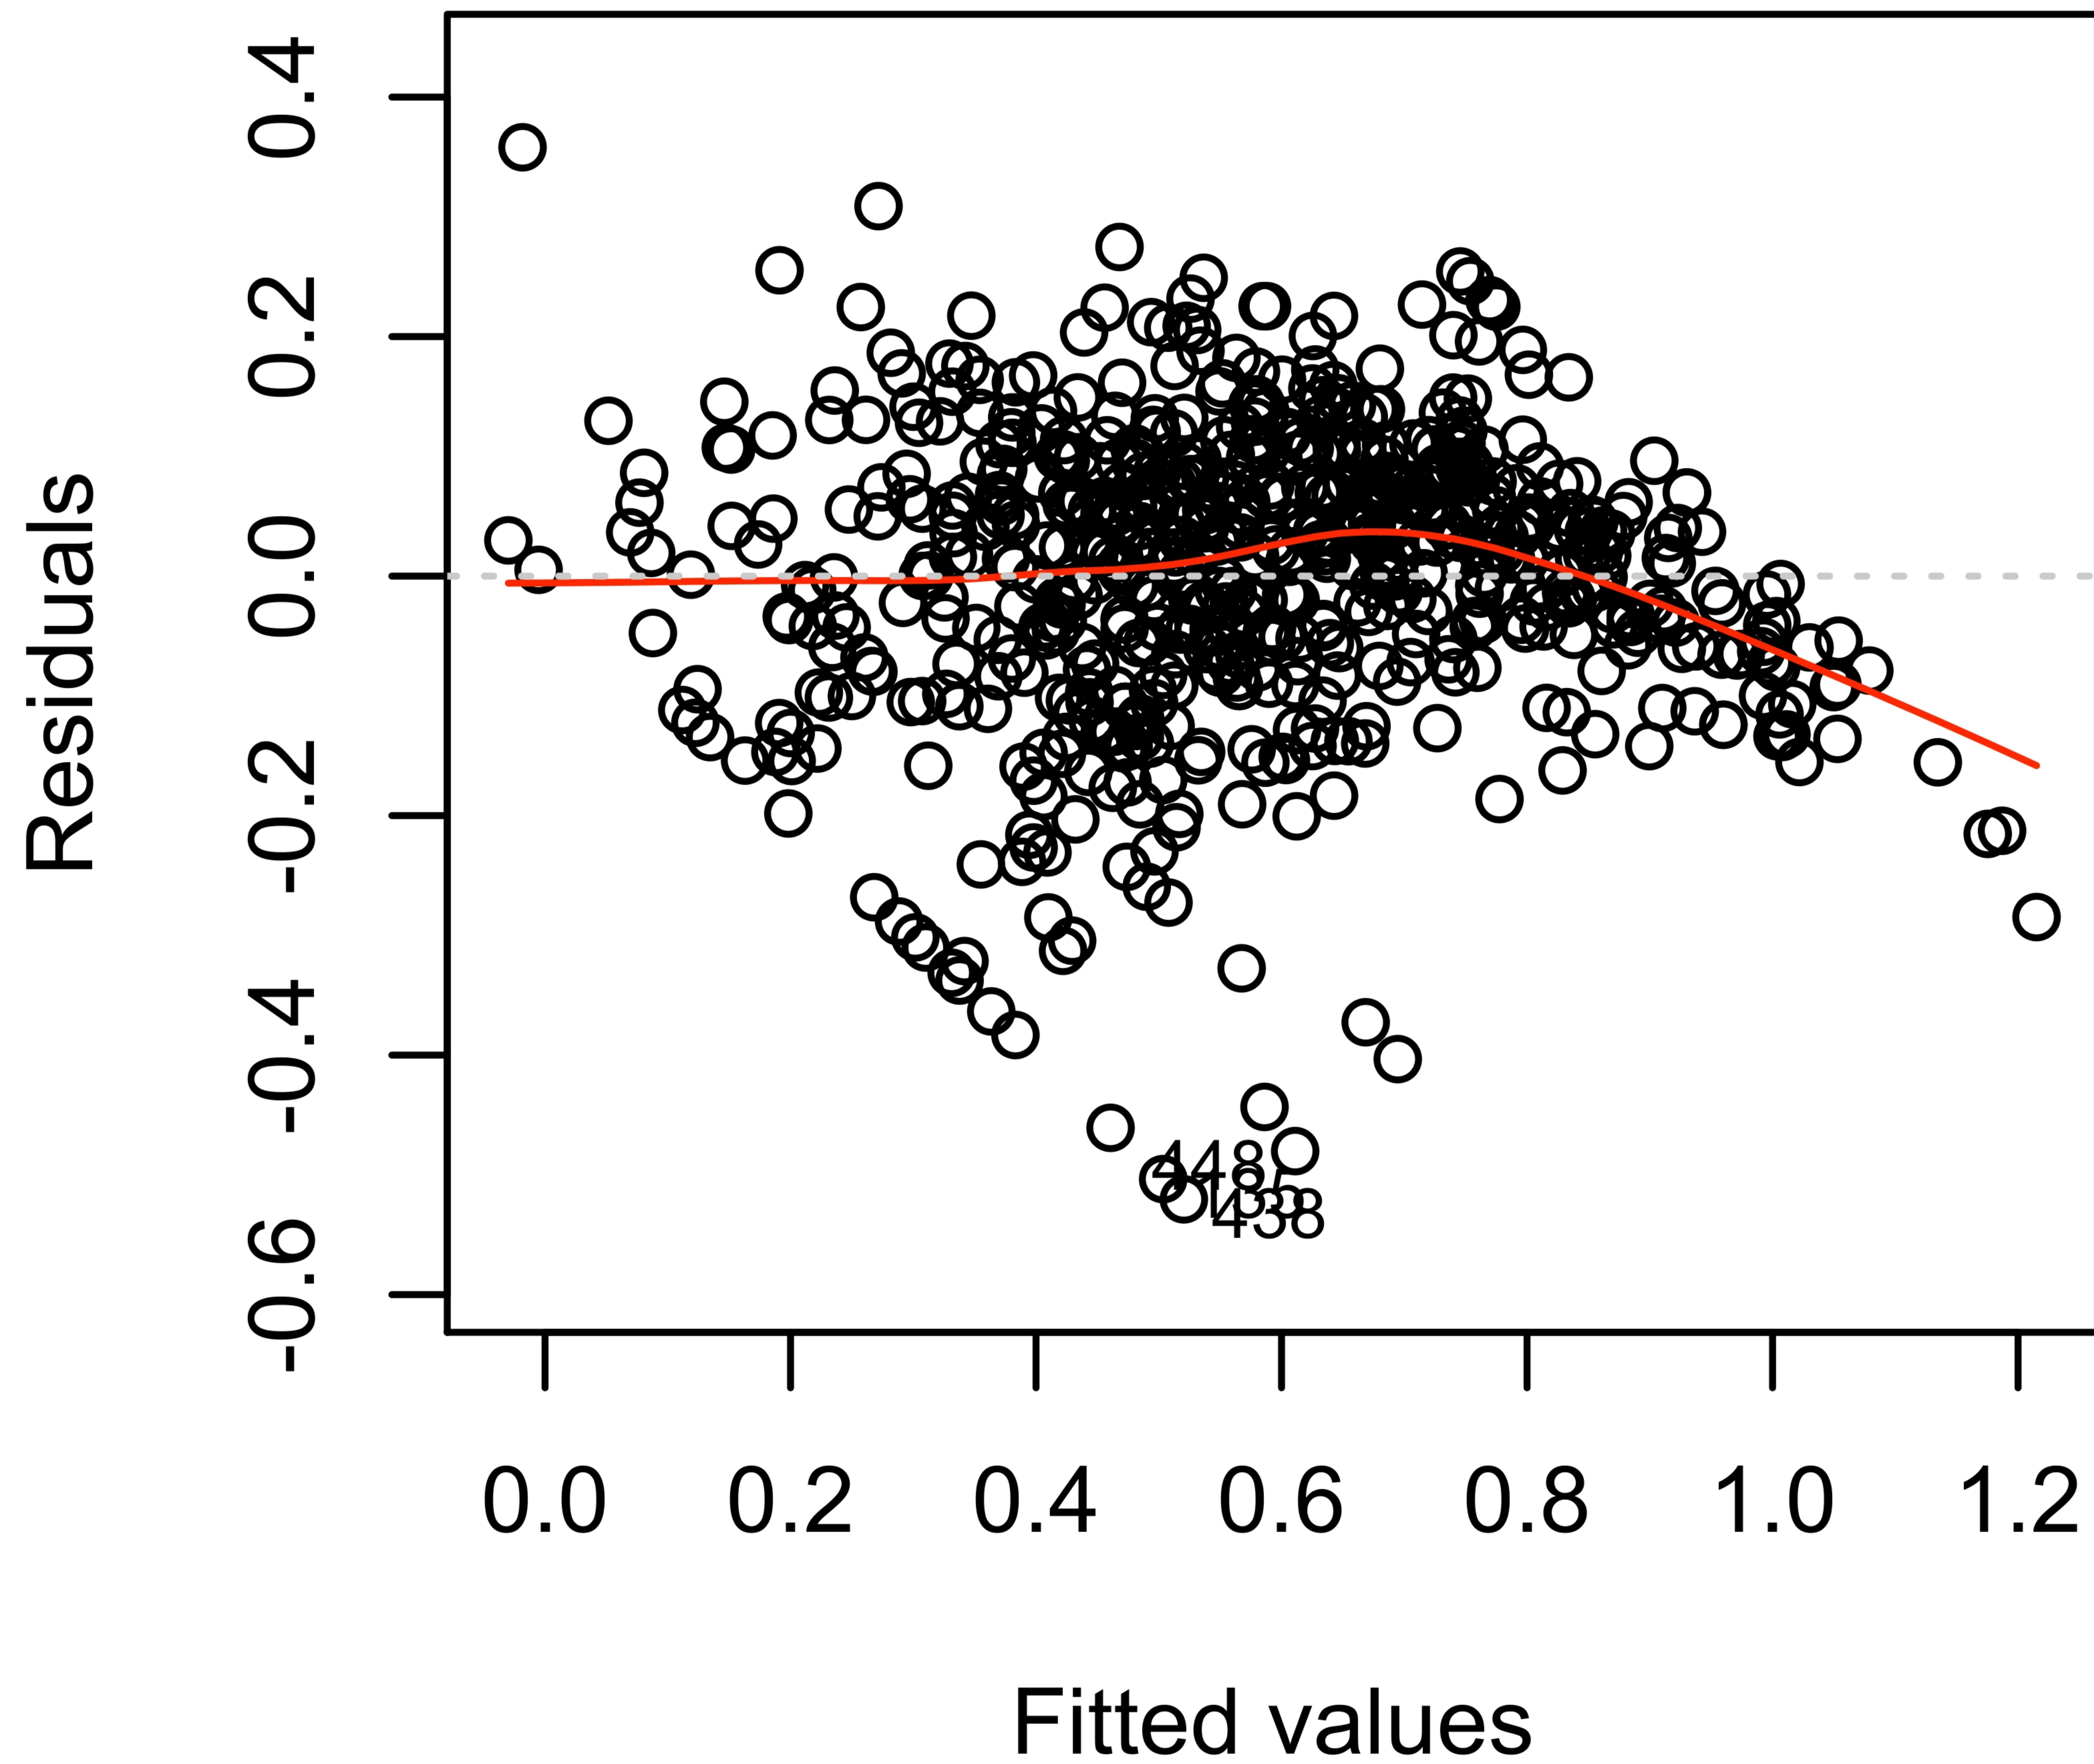

# Normal Q-Q

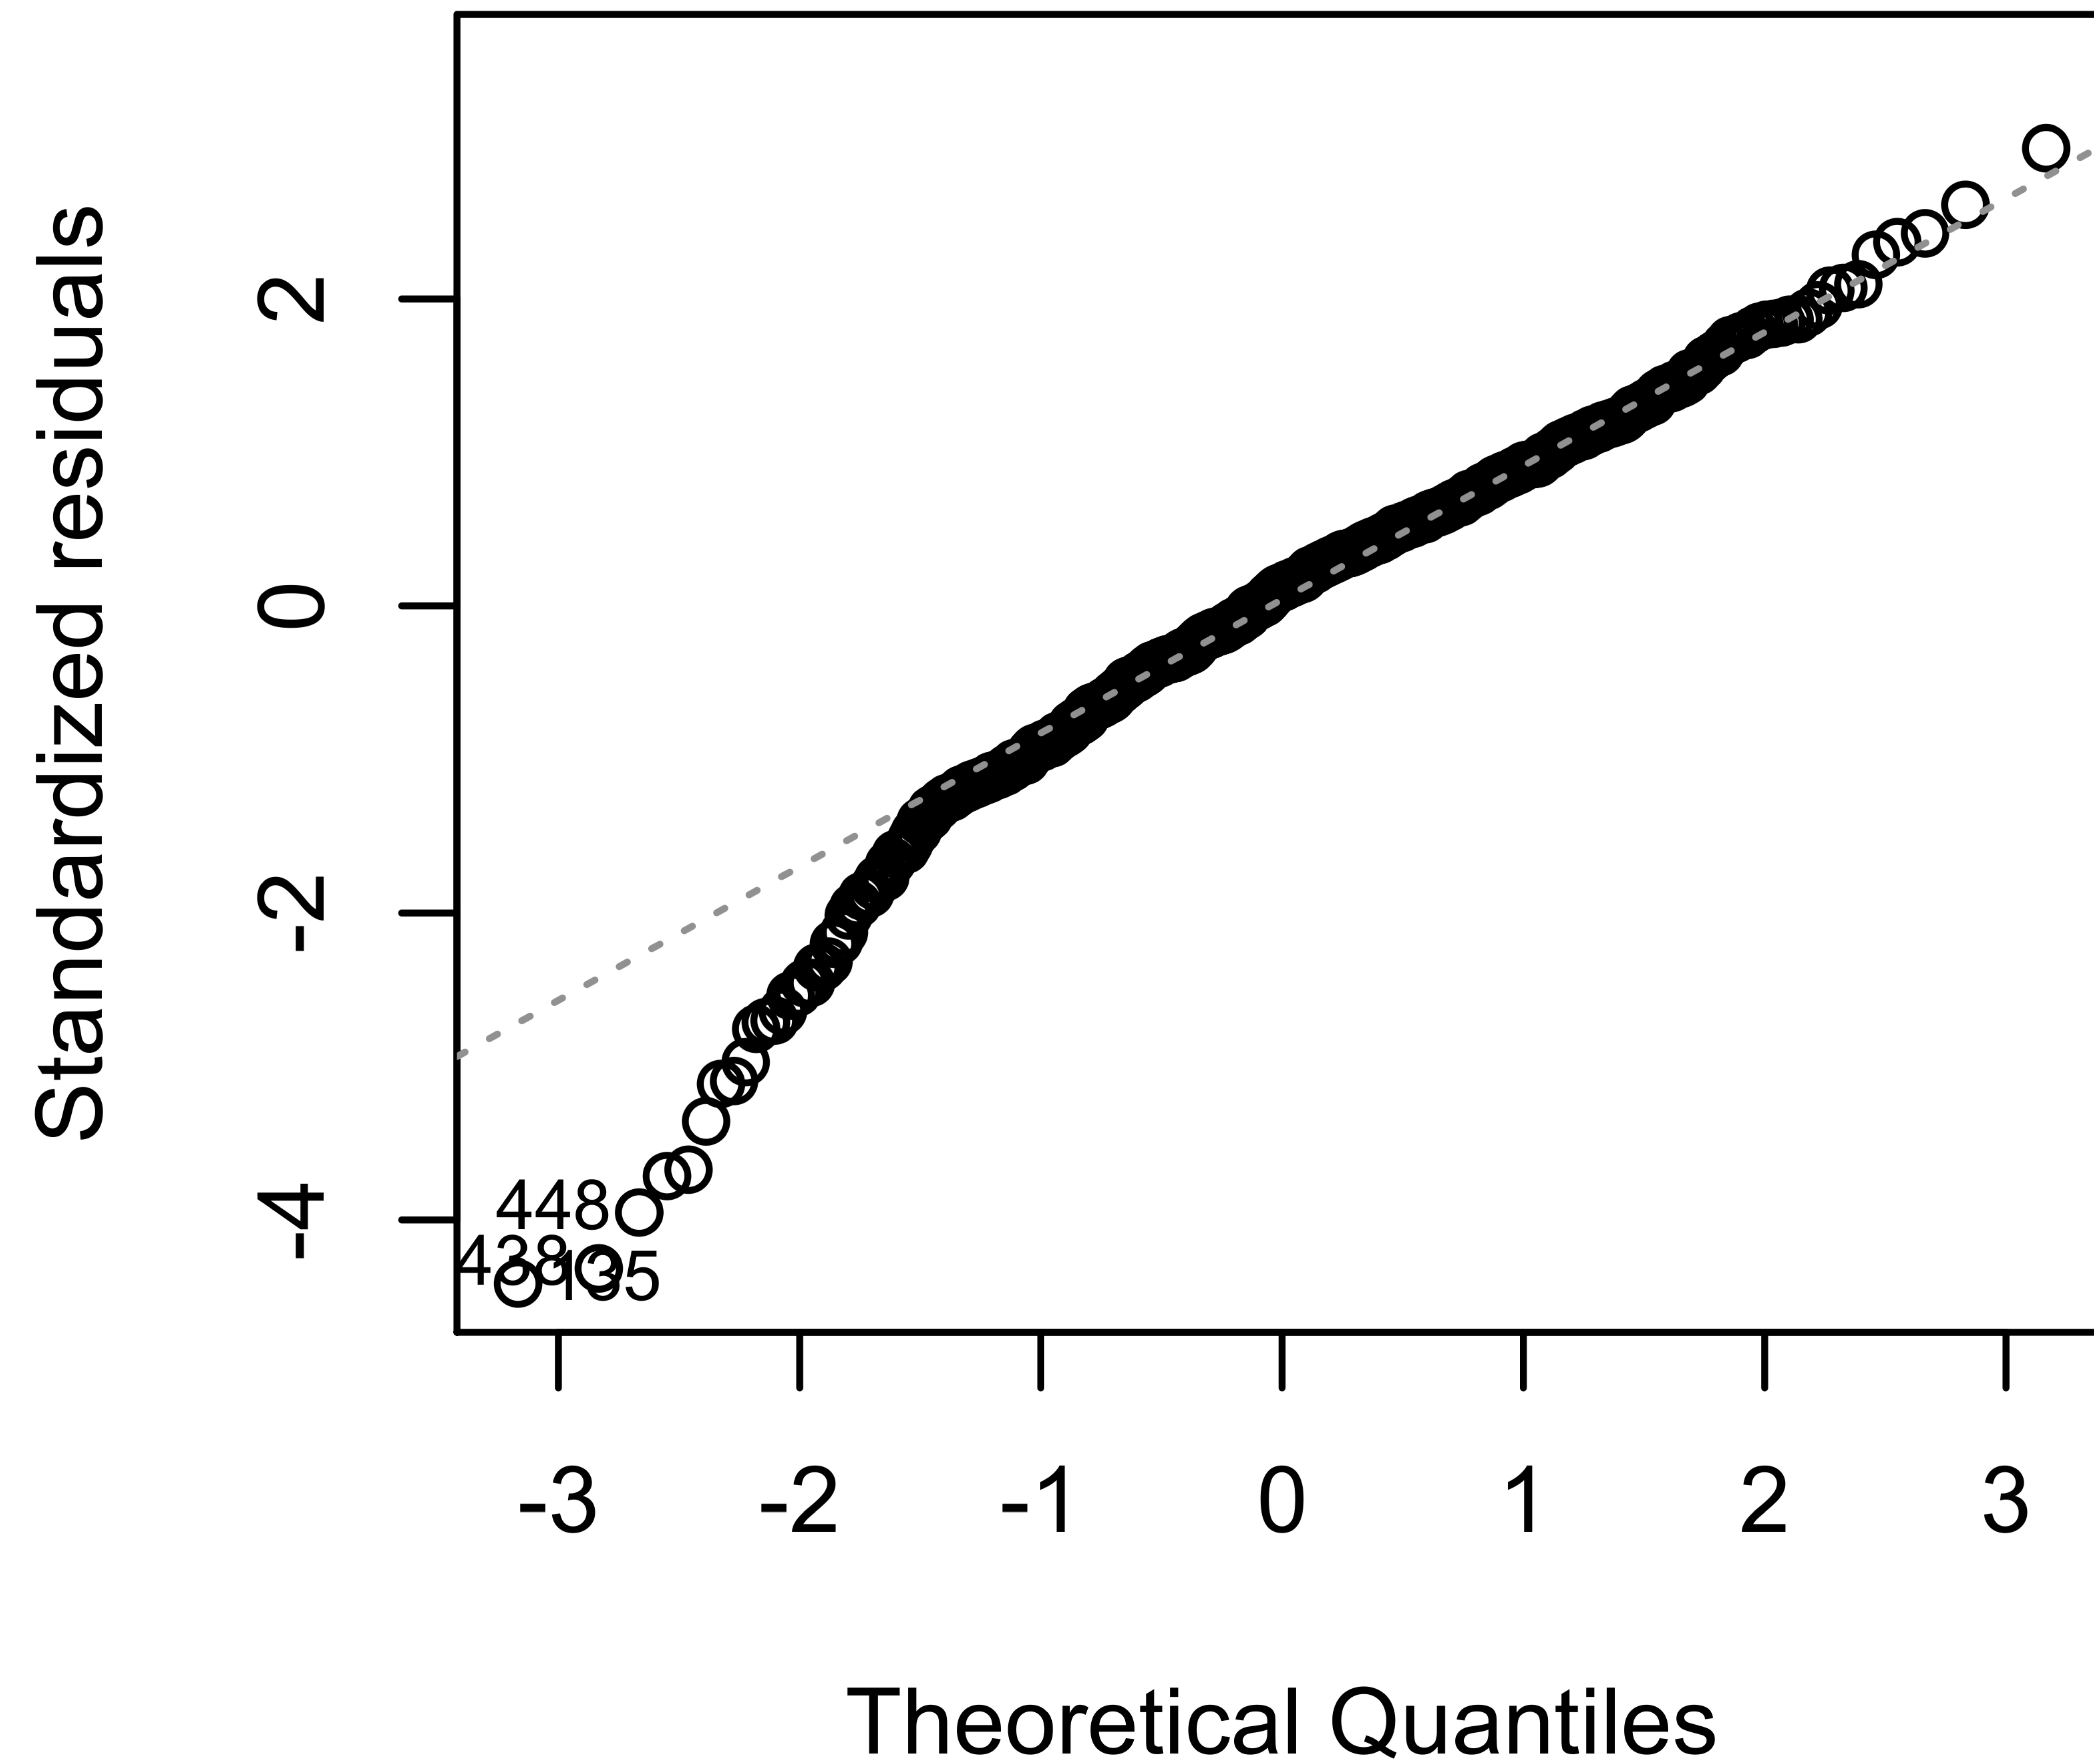

Supplement: Supplementary file 2 [file 1]

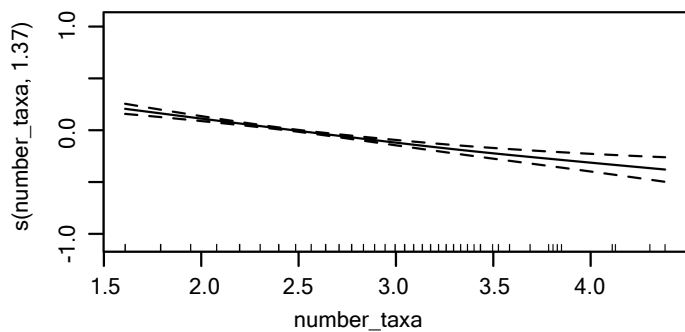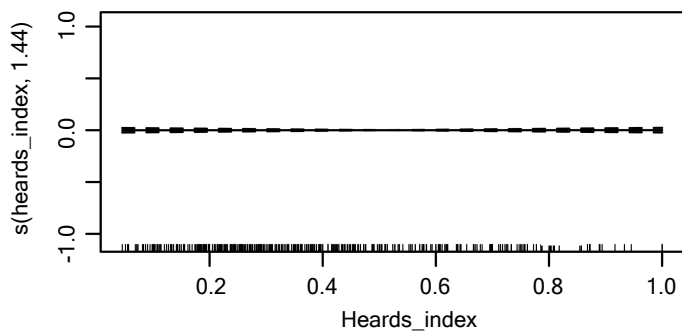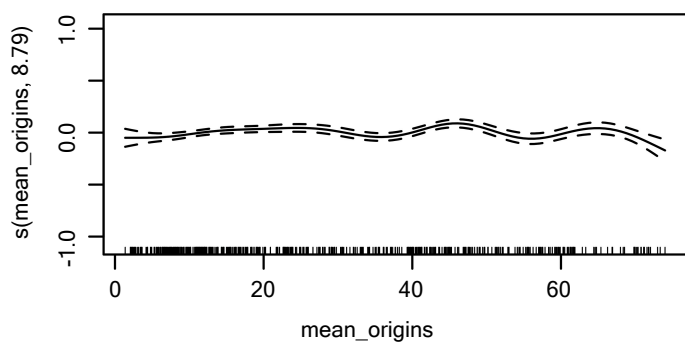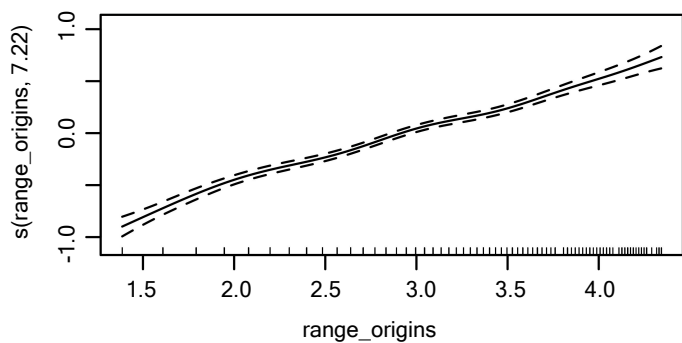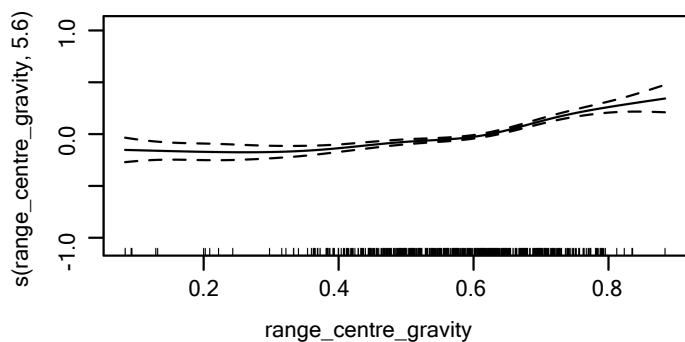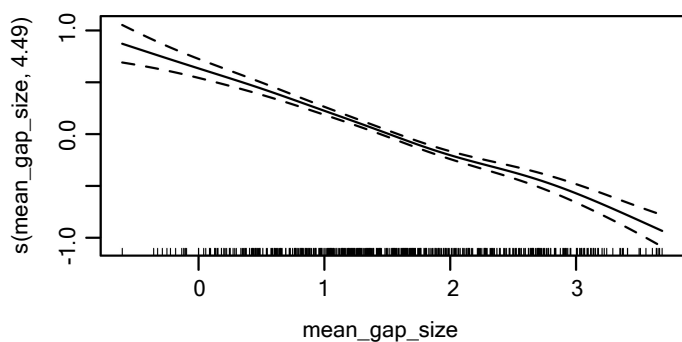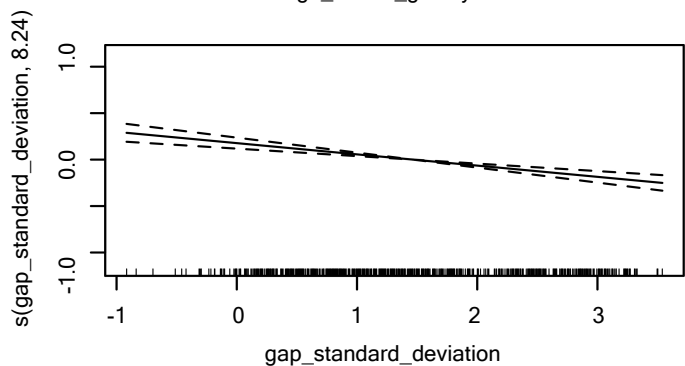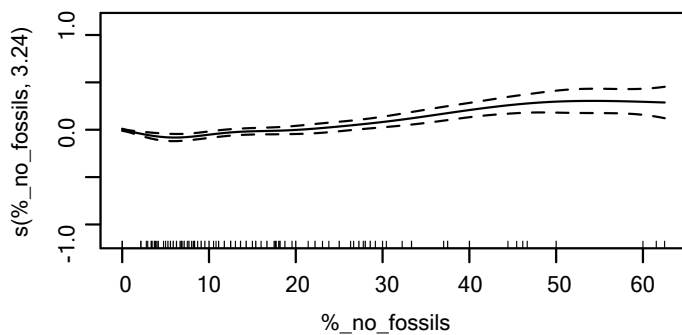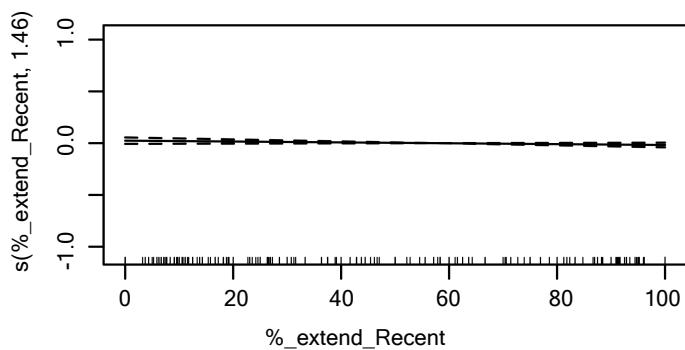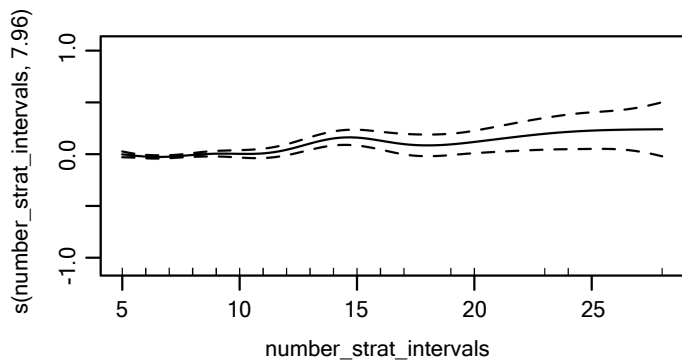

Supplement: Supplementary file 3 [file 1]
